# Supplementary material for: The impacts of pollution sources and temperature on the light absorption of HULIS were revealed by UHPLC-HRMS/MS at the molecular structure level
Source: Copernicus journal article supplement (doi:10.5194/acp-25-11505-2025), 2025-09-29
Supplement: Supplementary file 1 [file acp-25-11505-2025-supplement.zip]

## Sheet: identified compounds
Categories	Subcategories	Ionization	Components	Formula	m/z	RT (min)	Reference Ion						Concentration in Atmosphere (ng/m3)																								Level*	Mass accuracy (ppm)	VIP	Coefficient	Strong BrC chromophore
								2023-01-01	2023-01-02	2023-01-03	2023-01-04	2023-01-05	2023-01-06	2023-01-07	2023-01-08	2023-01-09	2023-01-10	2023-01-11	2023-01-12	2023-01-13	2023-01-14	2023-01-15	2023-01-16	2023-01-17	2023-01-18	2023-01-19	2023-01-20	2023-01-21	2023-01-22	2023-01-23	2023-01-24	2023-01-25	2023-01-26	2023-01-27	2023-01-28	2023-01-29
CHN	Aromatics	ESI+	1,2-Dimethylimidazole	C5H8N2	97.076	0.994	[M+H]+1	0	0	0.633586	0.232582	0.285026	4.53532	0	0	0.093272	0	0	0	0.0255701	0	0	0	0	0	0	0	0.402619	0	0	0.284579	0.0457054	1.32544	0.0997697	0	0.342776	Level 2	0.23
CHN	Aliphatics	ESI+	Diisopropylamine	C6H15N	102.128	1.007	[M+H]+1	0	0.0856734	50.7957	3.78807	1.97549	22.5913	26.0605	15.2189	17.5544	1.29894	1.11634	1.9316	0.756513	0.157392	0	0	14.2572	5.87227	12.514	0.62193	0.274929	0.401825	0.343262	0.182338	0.480868	2.31914	1.6784	1.09539	8.38302	Level 2	0.97
CHON	Aromatics	ESI+	2-Aminophenol	C6H7NO	110.06	1.027	[M+H]+1	3.45594	4.3742	9.22071	5.69176	5.42095	26.4453	7.44787	3.07732	4.8186	1.95504	2.25611	1.19368	8.18925	2.16615	3.8708	3.06712	3.90915	1.51719	2.91417	4.4927	4.83952	5.14686	4.47702	5.80193	6.99446	10.0555	5.43793	3.84427	7.29449	Level 2	-0.47	0.387042	0.00258402
CHO	Alicyclics	ESI+	2-Hydroxy-1-cyclopentene-1-carbaldehyde	C6H8O2	113.06	1.003	[M+H]+1	95.2426	104.774	113.082	109.733	110.155	76.6316	219.103	102.583	102.466	101.019	102.358	102.025	48.9389	112.831	109.044	119.281	115.809	102.743	101.662	124.69	155.854	125.819	131.187	126.655	125.344	123.217	115.421	115.488	119.796	Level 2	-0.33
CHO	Aromatics	ESI+	coumaran	C8H8O	121.065	0.986	[M+H]+1	33.1561	39.2698	74.3944	41.6014	38.5727	30.0115	52.0239	19.9804	39.3514	16.4785	21.0681	18.2538	0	23.3249	33.6973	22.4192	38.8563	13.5469	22.6856	43.1823	59.0069	39.3075	42.4503	48.992	68.4042	71.1217	46.8279	38.4593	54.685	Level 2	-1
CHO	Aromatics	ESI+	Acetophenone	C8H8O	121.065	8.031	[M+H]+1	0.747195	3.05201	7.66907	3.89629	3.99974	16.2072	3.79541	1.46971	1.37287	0.790239	1.02796	0.978607	0.525688	0.592236	2.52608	1.48704	2.89409	0.479642	0.977248	1.85127	1.82063	1.91931	2.23969	3.75266	4.14035	4.1222	2.51844	1.87139	3.74817	Level 2	-1.24
CHN	Aromatics	ESI+	2,4-Xylidine	C8H11N	122.096	1.023	[M+H]+1	0	2.91181	5.63551	2.00528	0.227772	35.3812	0.696551	0.169043	0.509622	0	0	0	7.15734	0	0	0	0.136499	0	0	0.153443	0.162888	0.0393383	0	8.31702	0.289736	3.35237	0.169496	0	1.21261	Level 2	-1.04
CHO	Aromatics	ESI+	4-Hydroxybenzaldehyde	C7H6O2	123.044	4.341	[M+H]+1	7.74925	9.76194	18.2508	11.03	7.84817	21.7426	17.0136	6.30591	6.45125	4.48111	3.21047	2.06861	4.66021	4.73057	9.65363	6.97626	11.204	5.89038	7.19761	9.31022	10.0504	9.72565	10.2995	12.55	14.9058	13.2041	12.81	10.3976	11.5969	Level 2	-1.16
CHO	Aromatics	ESI+	2-Hydroxybenzaldehyde	C7H6O2	123.044	0.895	[M+H]+1	4.25695	4.0649	6.80459	4.93411	3.61137	3.50057	7.61761	3.55143	4.69102	2.28557	1.74228	1.35314	1.17488	3.00447	3.623	3.25566	4.82406	3.0224	3.47558	4.95251	5.50139	4.64251	5.73632	5.19383	5.48986	6.7286	6.02666	6.46629	6.04928	Level 2	-0.49
CHN	Aromatics	ESI+	Trimethylpyrazine	C7H10N2	123.092	1.03	[M+H]+1	0.242247	0.930035	2.02946	1.02752	0.70066	8.05713	0.666981	0.207783	0.742383	0	0	0	0.116888	0.0498369	0.326574	0.158896	0.638476	0.0273838	0.0995259	0.445311	1.0979	0.439212	0.435811	1.56619	0.998642	2.20499	0.824273	0.464523	1.22839	Level 2	-1.72
CHON	Aromatics	ESI+	2-Amino-4-cresol	C7H9NO	124.076	1.032	[M+H]+1	4.03962	5.98894	12.4811	8.02564	7.7643	33.8807	10.083	4.03246	6.27381	1.89147	2.88672	1.8237	8.38451	2.72074	4.52331	3.20225	5.66228	1.92686	3.37818	4.64803	6.4905	5.64999	5.40848	8.47732	8.14349	15.1886	7.08414	4.75334	11.0065	Level 2	-0.72	1.38269	-0.0441551
CHN	Aromatics	ESI+	1-t-Butylimidazole	C7H12N2	125.107	1.014	[M+H]+1	0.26216	1.87389	4.94016	2.43368	1.98392	27.0998	1.33812	0.77789	1.58288	0.348833	0.417897	0.277026	2.78791	0	0.178105	0	0.782411	0	0.196121	0.547878	1.53741	0.330649	0.663228	3.22904	1.29141	4.23474	1.35816	0.604727	2.88133	Level 1	-1.33
CHO	Aromatics	ESI+	trans-Cinnamaldehyde	C9H8O	133.064	8.937	[M+H]+1	1.76665	2.94267	4.9801	4.75126	3.89136	14.9884	5.83995	2.00918	2.62596	1.64344	1.76416	1.41257	1.44006	1.33788	1.62041	1.67183	1.74341	0.830808	1.24822	2.87955	2.03246	2.21263	2.84528	2.35044	2.68927	4.34026	3.06773	2.27069	3.42278	Level 2	-2.78
CHN	Aromatics	ESI+	1-Methyl-1H-1,3-benzodiazole	C8H8N2	133.076	0.976	[M+H]+1	0	1.17537	2.79906	1.31124	0.890006	18.2241	0.616772	0.233814	0.736489	0	0	0	0.0642896	0	0	0	0.171076	0	0	0.207524	0.58162	0.0808126	0.307696	2.27992	0.672199	2.42838	0.579515	0.0153108	1.6143	Level 2	-1.41
CHO	Aromatics	ESI+	1,3-Dihydro-2-benzofuran-1-one	C8H6O2	135.044	1.026	[M+H]+1	1.60045	2.04784	3.33972	3.18557	3.00041	6.54965	5.09124	1.7418	2.43454	1.58589	2.09904	1.38446	0.863816	2.11402	2.3029	2.60862	2.31944	1.44133	1.77443	3.85197	5.01938	5.61037	2.64812	2.28199	3.63494	4.28128	2.69017	2.1231	2.91706	Level 3	-2.09
CHO	Aromatics	ESI+	Benzene-1,3-dicarbaldehyde	C8H6O2	135.044	5.162	[M+H]+1	0.785149	1.33292	1.93719	1.74805	1.68209	9.36347	3.2231	1.07905	1.10269	0.996548	1.11776	0.847336	1.62751	0.999347	1.55127	1.74875	1.48777	0.756645	1.03489	1.93603	2.23116	2.85146	1.34648	1.62583	1.88841	1.93102	1.22322	0.865211	1.34253	Level 2	-1.67
CHO	Aromatics	ESI+	2,4-Dimethylbenzaldehyde	C9H10O	135.08	14.896	[M+H]+1	3.21418	4.425	5.58168	10.1286	9.8649	11.7098	7.83751	2.88765	3.03806	3.25363	2.95689	3.06506	1.1811	0.453603	0.804629	0.873738	0.859319	0.488049	1.6224	8.52432	2.64453	1.90747	1.91536	2.95527	3.62964	4.24569	4.91933	4.20915	4.40277	Level 2	-1.69
CHON	Aromatics	ESI+	2-Amino-6-ethenylphenol	C8H9NO	136.076	1.008	[M+H]+1	1.14561	1.3584	3.469	2.35808	1.70323	9.66048	2.69417	1.7518	1.77193	0.975809	0.957845	0.608978	7.26698	0.909938	1.38433	1.12851	1.84454	0.872392	1.06741	1.6053	2.02393	2.52342	1.76115	1.76012	2.35005	3.63368	2.11357	1.49437	2.82848	Level 2	-1.71	0.497881	-0.0147225
CHO	Aromatics	ESI+	2-Methoxybenzaldehyde	C8H8O2	137.06	0.997	[M+H]+1	14.9507	18.2565	36.8058	23.5396	19.2399	44.6211	33.2578	11.6664	19.1083	8.46436	8.17353	6.06279	4.57562	9.63652	16.1261	12.7587	17.4192	9.47937	10.8798	20.7502	23.3304	21.3962	19.681	19.5873	30.0391	36.7799	26.5305	20.6178	28.253	Level 2	-1.54
CHO	Aromatics	ESI+	2-[(1E)-1-Buten-1-yl]-5-methylfuran	C9H12O	137.096	0.938	[M+H]+1	148.079	207.249	248.622	221.578	207.193	44.1208	395.969	163.963	171.44	164.585	211.725	170.528	5.18103	146.853	175.931	201.279	217.737	146.153	174.992	206.525	249.007	189.595	169.599	185.187	265.777	248.581	175.37	175.839	207.208	Level 2	-1.98
CHN	Aromatics	ESI+	Tetramethylpyrazine	C8H12N2	137.107	0.992	[M+H]+1	0	0.242496	1.08797	0.38733	0.0741503	4.93516	0	0	0.246864	0	0	0	0	0	0	0	0	0	0	0	0.0779227	0	0	1.08542	0.158613	0.964698	0.141864	0	0.708519	Level 2	-2.68
CHON	Aromatics	ESI+	3-Pyridylacetic acid	C7H7NO2	138.055	0.996	[M+H]+1	0.206678	0.256536	0.419757	0.377371	0.335042	2.14242	0.533065	0.245519	0.326687	0.227201	0.249013	0.171692	2.92855	0.151058	0.231518	0.189261	0.231254	0.143049	0.214332	0.245671	0.251127	0.255734	0.170273	0.174163	0.280349	0.387102	0.279213	0.211034	0.272221	Level 2	-2.29	1.28813	-0.0244832
CHON	Aromatics	ESI+	2-Methoxy-5-methylaniline	C8H11NO	138.091	0.972	[M+H]+1	3.36585	6.30682	12.221	8.33714	7.21512	30.3759	8.6742	3.48585	5.68914	1.79478	2.44246	1.37644	7.98195	2.48511	3.14558	2.51248	4.49639	1.75728	2.44504	4.2937	6.21679	4.38592	5.2727	9.10104	7.51823	15.4676	6.63982	4.19587	11.005	Level 2	-1.05	0.673723	-0.00625155
CHN	Aromatics	ESI+	1-Tert-butyl-4-methyl-1H-imidazole	C8H14N2	139.123	1.018	[M+H]+1	0	0.859418	3.02007	1.23662	0.979755	16.7853	0	0.0266374	0.54386	0	0	0	0	0	0	0	0	0	0	0	0.162082	0	0	3.45939	0.162193	2.54175	0.300144	0	1.51062	Level 2	-1.2
CHON	Aromatics	ESI+	Pyridine-2,6-dimethanol	C7H9NO2	140.07	1.032	[M+H]+1	0.604928	0.781093	1.66554	1.44128	1.84964	3.54628	2.13538	0.641224	0.896264	0.500694	0.538119	0.510571	0.239999	0.425651	0.741708	0.548523	0.662644	0.339891	0.377425	0.912464	0.983525	1.0607	0.600278	0.654891	0.941181	1.87776	0.9594	0.626297	1.56277	Level 2	-2.25	0.366664	-0.0121636
CHO	Aromatics	ESI+	1-(4-Ethyl-2-furyl)ethanol	C8H12O2	141.091	0.991	[M+H]+1	10.6507	16.416	18.2678	17.5804	15.3473	39.0484	29.3674	11.9876	11.4569	12.0604	17.1115	10.5287	12.1107	8.11208	12.5238	13.877	15.4308	9.30148	10.0078	16.3718	19.0098	15.3531	11.0889	13.0021	24.2361	20.0982	14.0187	12.4896	14.45	Level 2	-2.07
CHO	Alicyclics	ESI+	Methyl 3-oxocyclopentanecarboxylate	C7H10O3	143.07	1.021	[M+H]+1	1.72026	3.08181	6.11335	4.06944	3.04581	9.92807	8.19789	3.8353	3.64507	2.65579	2.30288	1.55618	1.22013	1.38327	2.36772	2.42647	4.66033	2.57351	3.06083	2.89305	4.12039	4.02273	2.50512	2.56593	4.25263	4.38686	3.50199	3.48055	4.63849	Level 2	-2.85
CHN	Aromatics	ESI+	4-Phenylimidazole	C9H8N2	145.076	1.01	[M+H]+1	0	0	0.410003	0	0	1.68455	0	0	0	0	0	0	0	0	0	0	0	0	0	0	0	0	0	0.0310939	0	0.130407	0	0	0	Level 3	-4.2
CHON	Aromatics	ESI+	2-Formylindole	C9H7NO	146.06	7.347	[M+H]+1	0.387134	1.06609	1.76646	1.06819	0.979695	22.4148	1.123	0.474347	0.528175	0.295076	0.314304	0.261071	0.619702	0.288749	0.615779	0.420942	0.723045	0.247586	0.338788	0.451873	0.488684	0.405777	0.385965	0.6996	0.750364	0.977984	0.540039	0.378363	0.862231	Level 2	-2.95	0.789856	0.013755
CHON	Aromatics	ESI+	8-Hydroxyquinoline	C9H7NO	146.06	1.033	[M+H]+1	2.60341	4.7741	7.96164	5.62853	5.34325	4.82847	7.78151	2.52834	4.54505	1.56315	1.8449	1.4858	0.295118	1.48183	2.74764	1.83628	3.59705	1.41532	1.9579	3.68581	4.38375	3.69942	3.92954	5.89146	5.15093	10.1426	4.84228	3.52771	7.14128	Level 2	-0.86	0.62469	-0.0115118
CHO	Aromatics	ESI+	1,2-Indandione	C9H6O2	147.044	7.402	[M+H]+1	0.126408	1.82371	3.14783	2.63405	2.5241	18.7747	4.13444	0.94279	0.838851	0.652184	1.12649	0.235959	0	0	1.31723	1.08421	1.39309	0	0.611829	1.26725	1.14347	2.25067	0.651536	0.987085	2.37918	1.93492	1.00807	0.502174	1.47592	Level 2	-3.68
CHO	Aromatics	ESI+	Coumarin	C9H6O2	147.044	1	[M+H]+1	5.40381	7.15116	9.94288	9.21955	9.08497	10.5418	15.7078	5.34705	8.0172	5.25028	6.18557	4.55685	1.30325	4.54695	6.0302	6.215	6.51794	4.48301	4.90449	8.05597	10.8984	10.7016	5.83664	5.10507	10.486	12.6981	8.90196	6.32647	9.32624	Level 2	-0.61
CHO	Aromatics	ESI+	2-Propenal, 2-methyl-3-phenyl-	C10H10O	147.08	11.091	[M+H]+1	31.3594	48.2856	57.6855	41.7974	20.0054	109.003	63.3222	14.707	14.8003	12.9906	11.3677	4.87471	50.8521	26.5537	56.7428	60.1294	51.3858	15.1038	29.687	63.6352	71.2332	74.3968	58.81	67.8157	85.9635	82.0807	50.6354	33.797	66.8279	Level 2	-1.95
CHO	Aromatics	ESI+	2-Methylindanone	C10H10O	147.08	0.971	[M+H]+1	0.600837	0.70783	1.38444	0.900748	0.763132	3.06677	1.60197	0.181427	0.713376	0.0114087	0.107915	0.0169603	0	0.665365	0.753912	0.645497	0.637874	0.22956	0.41075	1.46542	2.28268	2.01284	1.12784	0.741609	1.5295	5.33399	3.59966	2.41398	3.78496	Level 2	-1.82
CHON	Aromatics	ESI+	1-Methyl-1H-indol-2-ol	C9H9NO	148.075	1.101	[M+H]+1	1.35893	2.49129	5.04396	2.75102	2.69325	7.74206	1.62046	0.957882	1.63071	0.773494	0.917988	0.757319	0.336817	1.0231	1.72251	1.17472	2.37557	0.886687	1.07089	1.91374	2.14252	1.60603	1.64804	3.51872	3.21691	4.60705	2.55057	1.80847	3.69239	Level 2	-3.05	0.565891	-0.00275549
CHO	Aromatics	ESI+	3,4-Dihydro-2H-1-benzopyran-4-one	C9H8O2	149.059	7.026	[M+H]+1	14.6769	34.1304	57.9176	41.4972	35.9663	219.747	34.3689	10.6625	11.7703	7.7526	7.22386	5.49319	54.8043	6.46743	23.2897	20.2152	29.402	6.2068	15.0339	19.3526	18.9372	20.7537	14.1764	18.6273	36.5004	40.8526	28.6656	19.8944	35.3043	Level 3	-2.26
CHO	Aromatics	ESI+	7-Hydroxy-1-indanone	C9H8O2	149.059	5.856	[M+H]+1	3.63148	7.1568	10.5207	8.11337	5.75374	11.9671	14.9541	3.99914	4.61954	3.54793	3.90198	2.40697	1.65594	2.49898	6.15784	6.03507	6.76176	3.19929	4.60538	5.34466	6.56092	6.50563	4.09666	5.45275	8.65347	7.95993	5.81595	4.96226	6.20026	Level 2	-2.24
CHO	Aromatics	ESI+	2-Hydroxycinnamaldehyde	C9H8O2	149.06	1.003	[M+H]+1	4.4321	5.5124	8.61121	6.33053	5.50166	13.5849	13.302	4.17248	6.66898	3.1407	3.79426	3.06548	1.68892	3.02669	4.32361	3.7386	4.79186	3.68778	3.73484	5.23152	7.78237	6.30163	4.29241	3.88759	7.75418	8.46479	6.13131	5.46767	6.42751	Level 3	-0.99
CHO	Aromatics	ESI+	1-Phenyl-2-butanone	C10H12O	149.096	1.003	[M+H]+1	7.02325	4.1315	5.7216	23.0304	20.5233	0	5.73772	1.13513	6.713	1.41115	3.64072	3.77095	0	6.18188	1.12112	3.8866	3.43374	3.6755	0	62.7994	12.3417	5.36827	5.17186	3.18836	10.029	12.5837	14.9654	11.9119	10.4134	Level 2	-2.04
CHO	Aromatics	ESI+	trans-Anethole	C10H12O	149.096	14.893	[M+H]+1	2.55955	6.69923	4.94693	35.2775	31.5274	83.9402	11.599	2.73925	1.09779	4.55648	1.7438	3.19588	6.03957	1.65176	5.22059	5.79826	5.62561	2.67258	2.38119	36.6679	3.61469	2.13915	3.03966	5.27705	7.09726	3.28686	10.7248	7.29589	4.9637	Level 2	-1.81
CHON	Aromatics	ESI+	Methyl-3-aminobenzoate	C8H9NO2	152.07	1.046	[M+H]+1	1.24124	2.13215	4.53474	4.23663	4.9886	12.2351	6.44709	2.40711	2.97988	1.59926	2.51386	1.10686	7.86301	1.01844	1.94209	1.41555	3.40528	1.48101	1.70748	3.02129	3.45168	2.77584	1.49079	1.59251	3.17647	5.64858	3.08008	2.08014	4.46979	Level 2	-2.21	0.251571	0.00570588
CHO	Aromatics	ESI+	2,6-Dihydroxy-3-methylbenzaldehyde	C8H8O3	153.054	0.927	[M+H]+1	9.92522	10.7054	16.6377	10.1557	5.41968	3.58711	16.0007	4.33165	7.79634	2.08788	2.31637	1.29853	0.865677	3.08093	6.54961	5.3538	7.60878	4.38007	4.5723	8.21204	9.41427	5.10129	6.90887	7.00812	13.5299	14.5817	12.4427	12.1321	9.48666	Level 2	-2.76
CHO	Aromatics	ESI+	Vanillin	C8H8O3	153.054	5.317	[M+H]+1	3.99457	6.0808	9.03214	5.12611	1.60409	18.1438	7.82819	1.7397	2.54626	0.948641	0.804104	0.66791	9.49132	1.98742	7.10777	6.34351	10.0177	4.12665	6.13518	8.46406	9.7962	5.94337	8.6645	10.1864	16.0311	8.28432	7.13321	6.93153	4.61592	Level 1	-2.14
CHO	Aromatics	ESI+	4-Isopropylcatechol	C9H12O2	153.091	1.021	[M+H]+1	5.0437	7.84342	11.6644	9.84233	9.22532	19.3167	13.3669	6.70802	6.83382	7.13847	8.56182	6.00728	2.1978	3.91629	6.01103	5.64258	7.46718	4.64324	4.69833	6.65073	7.30473	5.92334	5.60374	6.20624	10.4911	9.31351	6.84373	7.03207	9.55234	Level 2	-0.89
CHON	Aromatics	ESI+	3-Hydroxy-4-ethyl-1,2-benzenediamine	C8H12N2O	153.102	0.965	[M+H]+1	1.78666	1.72792	4.20822	2.90859	1.96325	11.6492	2.68693	0.889359	2.00355	0.342126	0.635759	0.382622	7.41573	1.05891	1.54267	1.04966	1.69162	0.423146	0.669019	2.2733	6.75452	1.92401	2.90202	4.45284	3.46594	9.14657	3.50261	2.20481	3.17184	Level 2	-2.45	0.236155	0.00266976
CHON	Aromatics	ESI+	1-Methoxy-2-(pyridin-3-yl)ethan-1-ol	C8H11NO2	154.086	1.634	[M+H]+1	0.150979	0.198901	0.330767	0.287756	0.29239	0.486603	0.395229	0.152625	0.210056	0.130714	0.147099	0.137872	0.105212	0.121763	0.160758	0.151971	0.174778	0.118519	0.1298	0.197189	0.241618	0.177347	0.170535	0.157489	0.248702	0.365591	0.199875	0.174387	0.30023	Level 2	-2.94	1.36681	-0.0349914
CHO	Aromatics	ESI+	Hydroxytyrosol	C8H10O3	155.07	0.993	[M+H]+1	1.83493	3.46173	8.67033	4.73574	4.68208	6.88472	5.2584	2.07935	2.75011	1.26224	2.56107	2.0514	0	0.735412	2.71231	2.12694	2.54078	0.886521	1.60837	3.93209	3.51693	2.83703	2.52948	2.77309	6.05995	5.4839	3.65081	2.94032	4.75003	Level 2	-1.48
CHON	Aromatics	ESI+	1H-Indene-3-carboxamide	C10H9NO	160.075	10.028	[M+H]+1	0.914452	2.91696	4.63976	2.66885	2.36203	14.3839	1.70736	0.701335	0.812078	0.374667	0.539592	0.34502	0.328647	0.135596	1.46236	0.986379	1.85079	0.16691	0.629524	0.815938	0.807581	0.731815	0.835591	1.90873	1.84003	2.54177	1.28957	0.744212	2.22585	Level 3	-2.49	1.10112	0.0216069	ü
CHON	Aromatics	ESI+	1-(1H-Indol-3-yl)ethan-1-one	C10H9NO	160.075	1.038	[M+H]+1	2.06767	7.39433	15.5745	8.76533	7.94345	24.8944	6.93421	2.56243	6.07889	1.1011	1.89716	1.59148	0.0221611	0.730249	2.38496	1.17095	3.06814	0.843993	1.65995	3.26376	6.05481	3.26037	3.99066	16.8508	7.10714	18.6673	6.32952	3.32707	13.7221	Level 3	-1.25	0.707363	-0.0103808
CHO	Aromatics	ESI+	2-[(1Z)-3-Oxoprop-1-en-1-yl]benzaldehyde	C10H8O2	161.059	9.761	[M+H]+1	3.07325	7.31869	10.9339	9.41907	6.30662	63.7794	13.3586	4.96628	4.62	4.67958	4.25256	1.74488	7.90805	1.98949	5.40003	5.07242	6.34303	2.77114	4.31329	4.62026	5.26471	5.54932	3.88867	5.74431	8.45012	7.05404	5.52856	4.60022	6.39194	Level 3	-2.53
CHO	Aromatics	ESI+	Naphthoresorcinol	C10H8O2	161.059	10.547	[M+H]+1	0.941063	2.98763	4.49059	4.71982	3.08453	9.95187	6.3009	2.45357	2.51418	2.73771	2.20148	0.82385	1.30662	0.422076	1.87805	1.80726	2.04862	1.2728	1.61941	1.71367	2.51492	2.55467	1.13247	1.30472	3.13415	3.41643	2.01629	1.93819	2.8672	Level 2	-2.38
CHO	Aromatics	ESI+	7-Methyl-2H-chromen-2-one	C10H8O2	161.059	1.014	[M+H]+1	5.77726	8.72094	13.7266	15.1842	10.7464	10.5512	20.6355	8.5049	14.1692	8.75931	7.22884	4.77505	0.647017	4.77607	6.18338	5.73489	6.48465	7.12307	5.92503	7.9993	14.6705	10.7008	5.84793	4.35486	10.5108	16.5865	9.54915	8.22122	13.7266	Level 2	-1.76
CHON	Aromatics	ESI+	2-Methyl-1,2-dihydrophthalazin-1-one	C9H8N2O	161.071	1.135	[M+H]+1	0.674171	1.44204	3.37392	2.07903	1.75579	2.68025	1.50951	0.525789	1.50645	0.321116	0.607701	0.260605	0	0.209045	0.60132	0.50406	0.911721	0.0519482	0.451389	0.617805	1.05613	0.476606	0.765669	0.865828	1.35314	3.36675	1.26842	0.744981	2.48361	Level 2	-2.57	0.995844	0.00931875
CHO	Aromatics	ESI+	2-Isopropylbenzofuran	C11H12O	161.096	0.94	[M+H]+1	4.69934	4.48702	8.32247	7.31183	5.56371	0.698243	7.44302	2.1039	6.79686	2.23248	2.19649	0.872182	0	4.74749	4.07338	3.86863	5.01041	3.6247	3.34656	7.03527	12.3232	8.74279	6.45266	4.31353	9.44843	11.5419	8.95718	6.31679	8.0476	Level 2	-2.23
CHO	Aromatics	ESI+	4-Methyl-1-Tetralone	C11H12O	161.096	12.55	[M+H]+1	66.3485	103.628	127.088	103.412	627.89	97.0984	152.013	47.5262	52.9528	47.8555	40.2487	20.4746	64.3043	44.5945	91.2346	79.7611	95.5485	35.968	58.8668	87.6013	99.358	90.2678	74.6824	91.5598	146.655	109.353	100.564	77.9728	88.5445	Level 2	-1.7
CHN	Aromatics	ESI+	Tryptamine	C10H12N2	161.107	0.991	[M+H]+1	0	0	0.346856	0	0	4.41375	0	0	0	0	0	0	0	0	0	0	0	0	0	0	0	0	0	1.63802	0	0.00842881	0	0	0.00172521	Level 2	-2.6
CHO	Aromatics	ESI+	1H-Inden-1-one, 2,3-dihydro-7-hydroxy-3-methyl-	C10H10O2	163.075	11.232	[M+H]+1	9.20297	17.8503	31.7027	22.541	19.4496	68.8819	29.4057	13.0983	13.5498	10.9264	11.5263	7.2762	9.2769	5.64157	13.3619	12.1295	14.9947	6.83384	9.89592	12.4601	12.6555	11.9027	10.5864	13.8974	21.7542	17.9424	14.2041	12.5878	19.0952	Level 2	-3.46
CHO	Aromatics	ESI+	(E)-2-Methoxycinnamaldehyde	C10H10O2	163.075	0.992	[M+H]+1	5.43784	5.99329	9.70999	7.47801	7.21385	3.66721	11.4273	4.80317	8.84264	4.00007	4.24878	3.69933	0.577933	3.70584	5.05587	4.44868	5.9613	3.69627	4.12733	6.38092	8.3942	6.42678	5.79114	4.98495	9.06501	11.2243	7.76445	6.76173	9.47042	Level 2	-1.45
CHON	Aromatics	ESI+	6-Amino-3,4-dihydro-1H-quinolin-2-one	C9H10N2O	163.086	0.998	[M+H]+1	0	0.146625	0.868835	0.374856	0.422002	1.50233	0	0	0.229242	0	0	0	0	0	0	0	0.0442322	0	0	0.0379226	0.0687415	0	0.0722823	0.445866	0.290455	1.06854	0.233258	0.0589895	0.685586	Level 2	-1.77	0.92381	0.00147662
CHON	Aromatics	ESI+	7-Hydroxy-1,2-dihydroquinolin-2-one	C9H9NO2	164.07	1.003	[M+H]+1	0.0599081	0.0831058	0.548689	0.400365	0.32487	0.569175	0.0454741	0	0.134102	0	0	0	0	0	0.0694099	0	0.0143004	0	0	0.135367	0.122414	0.0838117	0.0985501	0.0706902	0.301945	0.802981	0.346213	0.0620188	0.530916	Level 2	-1.93	0.90454	0.0095173
CHON	Aliphatics	ESI+	Methyl 2-[(hydrazinecarbonyl)oxy]-2-hydroxyacetate	C4H8N2O5	165.051	1.023	[M+H]+1	6.56361	7.64952	9.50703	10.1207	5.21494	40.8656	20.0045	6.96869	6.83638	8.5208	5.99025	2.64466	9.19371	5.11526	7.21265	7.46929	7.60446	7.58938	6.46825	7.79491	13.388	12.632	7.96776	8.7121	13.9688	12.7719	9.77858	10.9177	12.8793	Level 3	3.37	0.697772	0.00168096
CHO	Aromatics	ESI+	2,3-Dihydro-1-benzofuran-2-carboxylic acid	C9H8O3	165.054	5.458	[M+H]+1	12.7315	23.5801	52.9397	35.8736	40.3343	150.959	47.461	15.9633	22.8551	6.44355	11.7587	9.81341	4.31321	7.60549	22.3755	16.919	19.2876	3.5357	11.4693	22.1087	16.86	26.3727	17.4748	17.5237	30.7592	31.1484	23.1792	12.9329	30.3608	Level 2	-2.43
CHO	Aromatics	ESI+	Ethyl 2-phenylacetate	C10H12O2	165.09	1.082	[M+H]+1	0.269397	0.318825	0.798813	0.534928	0.656723	0.354332	0.430421	0.216393	0.446373	0.154527	0.352208	0.356916	0	0.131449	0.209865	0.149434	0.214569	0.117145	0.16641	0.322701	0.367508	0.242293	0.296974	0.305005	0.482947	0.641842	0.431958	0.31131	0.57544	Level 2	-4.44
CHO	Aromatics	ESI+	(2,4-Dimethylphenyl)acetic acid	C10H12O2	165.091	11.94	[M+H]+1	1.90493	5.44036	12.7623	8.1703	7.77588	19.4393	8.08178	3.25209	3.43884	2.7499	3.42848	2.3407	0	1.05821	3.35318	2.81607	3.79965	1.30278	2.10238	3.50903	3.02321	2.86287	2.83281	4.43001	7.24847	6.12643	3.61836	2.88465	5.61512	Level 2	-1.71
CHON	Aromatics	ESI+	3-Pyridineacetic acid ethyl	C9H11NO2	166.086	1.579	[M+H]+1	0.25684	0.284322	0.473751	0.356664	0.367473	0.786155	0.517875	0.239897	0.29318	0.189548	1.16944	0.363667	0.978911	0.214991	0.234666	0.214258	0.299226	0.141173	0.192184	1.45185	0.744697	0.550623	0.319883	0.352976	0.377261	0.603467	0.350649	0.283045	0.472897	Level 1	-2.59	0.733002	-0.0126746
CHO	Aromatics	ESI+	1-(2-Hydroxy-5-methoxyphenyl)ethan-1-one	C9H10O3	167.07	0.891	[M+H]+1	1.79031	2.981	11.2215	5.15782	3.00359	1.61057	4.69015	1.20878	2.94713	0.900377	0.940792	0.815842	0	0.71452	2.10727	1.43677	2.28412	0.781875	0.884485	3.76387	3.01173	1.65074	2.10815	2.63653	8.15634	8.57228	4.42935	3.31732	4.6709	Level 2	-1.86
CHON	Aromatics	ESI+	6-Ethenyl-5-ethyl-1,2,3,4-tetrahydropyrimidine-2,4-dione	C8H10N2O2	167.081	0.855	[M+H]+1	0.544237	0.58873	2.18433	1.30216	1.49917	2.59967	0.796041	0.196604	0.845309	0.12014	0.459027	0.124544	0	0.027224	0.27881	0.0975277	0.38975	0.0619072	0.127296	0.553404	1.17035	0.253062	0.357651	0.636755	0.720229	2.52332	1.22263	0.709876	1.26492	Level 3	-3.51	0.739232	0.00656912
CHON	Aromatics	ESI+	2-sec-Butyl-3-methoxypyrazin	C9H14N2O	167.118	0.99	[M+H]+1	1.37527	2.35604	5.2425	2.93914	2.63872	6.77324	2.0381	1.04272	2.43454	0.336786	0.637184	0.392356	0.0348885	0.637373	1.23975	0.502977	1.68821	0.248052	0.63502	2.07234	5.99795	1.27238	2.58337	5.48668	3.36523	9.37643	2.94613	1.95578	3.63007	Level 2	-2.35	0.420555	-0.00310125
CHN	Aromatics	ESI+	1-t-Butyl-2,4,5-trimethyl-1H-imidazole	C10H18N2	167.154	0.988	[M+H]+1	0	0	0.800589	0.209279	0.114782	5.1132	0	0	0	0	0	0	0	0	0	0	0	0	0	0	0	0	0	1.64894	0	0.979489	0	0	0.325599	Level 2	-1.54
CHO	Aromatics	ESI+	naphtho(2,1-b)furan	C12H8O	169.064	12.589	[M+H]+1	5.67784	11.3205	14.4134	8.97351	4.06477	17.3401	13.015	1.28998	2.42178	1.56268	1.06363	0.893301	3.12037	3.2157	8.98936	7.10574	10.5456	1.69934	5.6139	7.79095	5.63985	8.83668	6.79886	8.64505	16.5198	12.8878	10.1593	5.62272	5.36653	Level 2	-2.46
CHON	Aromatics	ESI+	1-[5-(1,2,4-Triazolidin-3-yl)-1,3,4-oxadiazol-2-yl]methanamine	C5H10N6O	171.099	1.077	[M+H]+1	41.1476	23.0407	82.8986	33.1426	1.16473	11.0507	111.779	107.645	98.2361	27.2133	10.981	5.56729	38.6898	13.2386	34.8882	11.185	127.472	28.7938	96.1117	12.8603	11.4225	3.78821	6.80336	1.80259	13.0823	18.0132	11.2543	15.0879	82.6121	Level 3	-0.5	0.160498	-0.00285742
CHON	Aromatics	ESI+	1-Vinyl-1H-indole-3-carbaldehyde	C11H9NO	172.075	0.863	[M+H]+1	0.0547029	1.18663	2.97511	1.35458	1.02911	2.51527	0.523964	0.25269	0.952897	0.0759053	0.13656	0.0264511	0	0	0.0650532	0	0.338502	0.0483402	0.0189656	0.262023	0.491669	0.178192	0.219057	2.44313	0.828136	3.43422	1.06137	0.172921	2.02716	Level 2	-2.08	0.806266	-0.00444319
CHON	Aromatics	ESI+	Pyroquilone	C11H11NO	174.091	11.729	[M+H]+1	1.60705	3.97256	5.56996	3.02922	2.92151	17.6403	2.09338	1.05274	1.02232	0.64437	0.758664	0.557491	0.437062	0.290261	2.11974	1.31217	2.74558	0.454196	0.772246	1.24515	0.990254	0.859246	1.52342	2.8966	3.01742	3.592	1.81816	1.08356	3.52799	Level 2	-2.13	0.947823	0.0152193
CHON	Aromatics	ESI+	1-Methyl-3-acetylindole	C11H11NO	174.091	1.007	[M+H]+1	1.24836	3.76084	8.64949	4.43948	4.06553	11.0103	2.50813	1.14203	3.16605	0.336927	0.67372	0.505302	0	0.548753	0.852326	0.520324	1.42213	0.4852	0.434643	1.23564	3.47587	1.30736	1.65941	12.9342	3.16599	10.6001	2.8717	1.4158	8.21158	Level 2	-1	0.658847	-0.0116418
CHON	Aliphatics	ESI+	N-Acetylglycylglycine	C6H10N2O4	175.072	1.048	[M+H]+1	6.35197	8.85315	7.90279	7.40266	6.02658	1.08371	12.2186	6.52117	4.12574	6.88408	6.64595	1.95712	1.73355	4.45735	6.31876	6.835	8.06734	6.11401	3.89082	6.01037	6.02032	5.14981	8.07104	8.85031	17.0832	8.87628	7.94519	11.1927	9.35823	Level 2	3.53	0.403846	0.0113559
CHO	Aromatics	ESI+	3-Methylindene-2-carboxylic acid	C11H10O2	175.075	0.891	[M+H]+1	19.4964	19.4508	51.6303	37.6872	34.0498	34.2083	43.1931	20.1952	45.4181	12.405	14.2062	15.6116	0	13.7872	17.5613	12.6186	16.7999	12.0096	14.4876	27.9746	49.2086	38.7872	18.5072	11.137	24.3617	60.8886	35.7403	20.4766	53.2779	Level 3	-3.13
CHO	Aromatics	ESI+	2-Hydroxy-1,4-dihydro-1-naphthalenecarbaldehyde	C11H10O2	175.075	11.617	[M+H]+1	7.72785	15.2062	24.9929	19.737	18.192	74.4074	24.6463	12.625	11.4261	12.474	12.5087	7.88239	8.11794	4.35558	11.2735	9.99916	12.5728	5.68795	8.09336	10.2482	11.1466	10.9343	9.30823	12.0697	18.3842	16.7069	12.2671	10.1618	16.475	Level 3	-2.49
CHO	Aromatics	ESI+	4-Ethenyl-1,2,3,4-tetrahydronapthalen-1-ol	C12H14O	175.111	13.775	[M+H]+1	29.8567	55.6767	88.5658	66.2726	38.0657	36.9208	75.8174	39.4565	39.0379	35.1679	27.5017	9.45424	17.113	14.2856	40.2224	35.6953	48.468	15.4115	23.8147	35.3263	35.2924	32.0769	32.7815	41.4127	73.0198	64.7005	50.388	36.6328	62.5245	Level 3	-1.63
CHON	Aromatics	ESI+	1-Methyl-1H-indole-2-carboxylic acid	C10H9NO2	176.07	1.066	[M+H]+1	1.35072	2.86886	6.56593	3.63487	3.55672	3.2784	2.43584	0.951384	2.37541	0.559312	0.899637	0.510647	0	0.445084	1.36205	0.830231	1.24934	0.399616	0.647742	1.44737	1.82379	1.01314	1.51925	3.22754	3.04932	6.44035	2.70835	1.53552	4.98174	Level 3	-1.35	0.954873	0.00227139
CHO	Aromatics	ESI+	7-Hydroxy-4-methylcoumarin	C10H8O3	177.054	1.008	[M+H]+1	13.4999	22.5083	38.8283	29.0117	29.3267	44.5105	37.574	14.7084	19.2004	10.3967	13.2316	10.3968	0.827994	7.78011	16.3018	15.5763	19.7455	7.68176	11.832	18.2621	22.6148	17.4639	12.6299	14.3352	27.8787	29.7686	19.7588	16.2518	27.0829	Level 2	-3.62
CHON	Aromatics	ESI+	(-)-1,2,3,4-Tetrahydroisoquinoline-3-carboxylic acid	C10H11NO2	178.086	1.03	[M+H]+1	0.271675	0.260047	0.960854	0.496882	0.411813	2.744	0.3491	0.238074	0.522825	0.0139566	0.128151	0	0	0	0.184324	0.0945094	0.358022	0	0.0187527	0.314466	0.30732	0.24386	0.233356	0.276967	0.639719	1.39228	0.563165	0.302039	1.05997	Level 2	-1.08	0.918264	0.010291
CHO	Aromatics	ESI+	6-[(1E)-3,4-Dihydroxypent-1-en-1-yl]-2H-pyran-2-one	C10H12O4	179.067	0.967	[M-H2O+H]+1	7.61827	11.3898	10.7872	12.781	14.8788	56.4196	24.1697	12.8796	9.24158	15.3987	17.2643	9.83791	18.6689	6.22623	9.30236	9.86918	10.0116	9.72703	8.68265	9.68618	16.1053	13.9635	9.54245	10.1937	14.9648	14.8896	11.5109	12.7924	15.0695	Level 2	-18.8
CHO	Aromatics	ESI+	2-Methoxycinnamic acid	C10H10O3	179.07	0.944	[M+H]+1	6.8122	10.9186	23.8302	14.8421	13.0653	61.0456	21.4683	5.85694	10.7813	3.40876	4.42525	3.35067	3.89206	3.21363	9.79595	8.91906	11.2539	2.4346	4.98739	11.509	6.37918	8.35758	7.03403	10.3928	19.6053	14.0644	10.1056	8.05153	12.19	Level 2	-2.63
CHON	Aromatics	ESI+	2-Methyl-N-(propan-2-yl)pyridine-3-carboxamide	C10H14N2O	179.117	0.937	[M+H]+1	0.253739	0.436784	1.033	0.733358	0.661052	1.61528	0.729219	0.32979	0.609475	0.286285	0.332925	0.254731	0.207788	0.267719	0.296626	0.24069	0.340355	0.222127	0.278955	0.337825	1.08343	0.407254	0.50242	0.80039	0.508997	1.81076	0.595447	0.585169	0.973304	Level 3	-2.96	0.303461	-0.0101269
CHON	Aromatics	ESI+	2-Amino-6,7-dihydroxytetralin	C10H13NO2	180.101	1.015	[M+H]+1	0.863582	1.25536	3.19095	2.22273	2.8253	14.8943	2.64687	1.24872	1.64928	0.740297	1.15646	0.825024	7.38527	0.510196	0.723335	0.80376	1.0988	0.260714	0.64292	1.45828	2.17863	1.65274	0.942289	2.21529	2.11028	4.19311	2.05047	1.13951	3.12119	Level 2	-2.83	0.612212	-0.016382
CHO	Aromatics	ESI+	9-Fluorenone	C13H8O	181.064	11.94	[M+H]+1	74.5008	117.773	181.117	106.598	117.696	536.485	141.672	47.1855	68.0143	44.7797	57.6471	59.4644	28.3028	47.31	79.4498	60.2177	89.0022	31.0313	46.7719	87.6448	59.4894	58.8693	69.4077	91.2698	135.012	119.319	75.628	77.4527	122.279	Level 1	-3.66
CHO	Aromatics	ESI+	1,2-Dihydroacenaphthylene-1,2-dione	C12H6O2	183.044	9.646	[M+H]+1	0.521639	1.27537	2.17353	1.99205	2.5574	15.9412	2.19408	0.454073	0.790571	0.118073	0.685596	1.51527	0.850722	0.203537	0.791064	0.51809	0.780832	0	0.366127	0.514785	0.54395	1.06687	0.354679	0.609814	1.41566	2.03532	1.12645	0.843119	1.91617	Level 2	-2.16
CHO	Aromatics	ESI+	Syringaldehyde	C9H10O4	183.065	6.044	[M+H]+1	3.00648	4.7199	17.0764	9.04081	6.5212	5.4799	8.94693	1.77718	4.46246	1.21986	1.4455	0.972592	0.629641	1.16436	3.60563	3.16647	2.56388	0.732466	1.06306	3.84544	3.22289	2.1236	2.3604	3.8855	9.33665	8.7554	4.88057	5.58819	7.94603	Level 2	-1.9
CHO	Aromatics	ESI+	1H,3H-Benzo[de]isochromen-1-one	C12H8O2	185.059	11.055	[M+H]+1	0.968342	1.65281	2.79672	2.0436	1.79748	9.61148	2.21284	1.08893	1.09854	0.856724	1.13689	1.03048	0.669324	0.690461	1.54461	1.0501	1.30147	0.628792	0.854362	1.23292	1.03887	1.26796	1.23854	1.28887	1.61575	1.45749	1.15437	0.874762	1.31126	Level 3	-4.46
CHON	Aromatics	ESI+	2,3-Dihydro-1H-carbazol-4(9H)-one	C12H11NO	186.091	1.011	[M+H]+1	0.0660403	1.04568	3.6349	1.82384	1.04	7.11905	0.678713	0.204119	0.899925	0	0.0793882	0	0	0	0.055829	0.0404432	0.250911	0	0.0385648	0.197531	0.496752	0.209775	0.226285	4.2179	0.57474	3.89752	0.830464	0.139309	3.04912	Level 3	-0.86	0.693489	-0.00685744
CHON	Aromatics	ESI+	1-(1,2-Dimethyl-1H-indol-3-yl)ethanone	C12H13NO	188.107	13	[M+H]+1	1.33522	3.84599	7.32833	3.4169	3.01288	12.6534	1.53314	0.83027	1.43089	0.549035	0.654987	0.449602	0	0.170053	1.55224	0.840514	2.08395	0.232097	0.465114	0.809059	0.468432	0.368769	0.959489	2.2465	2.30771	6.24474	2.37507	1.05406	5.50619	Level 3	-2.6	1.08478	0.0136894	ü
CHO	Aromatics	ESI+	7-Methoxy-4-methylcoumarin	C11H10O3	191.067	1.035	[M+H]+1	6.14777	10.2695	15.3667	14.7926	13.782	39.3132	22.4607	7.4307	8.88775	8.88751	8.95762	8.05521	5.27043	5.70438	10.7088	8.12558	8.73145	5.68743	5.67062	10.9544	9.69564	9.7847	13.9047	15.0335	17.0187	17.5487	12.7161	10.4681	14.0741	Level 2	-16.42
CHON	Aromatics	ESI+	2-(5-Methoxy-3H-indol-3-yl)ethan-1-ol	C11H13NO2	192.101	1.009	[M+H]+1	0.55769	1.18023	2.94128	1.7294	1.62217	1.67974	1.32651	0.578231	1.31837	0.20467	0.3907	0.201357	0	0.274867	0.518064	0.492773	0.70118	0.212181	0.355267	0.922498	1.23506	0.782472	0.774303	0.98103	1.34214	2.94326	1.24956	0.811185	2.19766	Level 2	-2.68	0.892964	0.00375041
CHON	Aromatics	ESI+	2-Amino-3-hydroxy-2,3-dihydro-1H-indene-1-carboxylic acid	C10H11NO3	194.08	0.901	[M+H]+1	0.564123	0.721545	1.76483	1.27076	1.13782	8.92349	1.25385	0.455115	1.46544	0.290001	0.556369	0.255968	0	0.248	0.294262	0.34014	0.709015	0.284687	0.558397	0.556819	1.093	0.850793	0.472391	0.959702	1.30462	1.73587	1.01373	0.924652	1.50553	Level 2	-3.31	0.774902	-0.0177281
CHON	Aromatics	ESI+	Methyl 2-methyl-4,5,6,7-tetrahydro-1H-benzimidazole-6-carboxylate	C10H14N2O2	195.112	1.075	[M+H]+1	3.55572	4.01121	6.93556	4.46629	5.31333	9.54116	4.4977	2.16865	3.20775	1.34988	1.65954	1.47881	0.203066	1.02989	2.13121	1.44114	2.78224	0.786961	1.58597	2.70387	4.07829	1.76304	2.14535	3.15392	4.28008	6.83737	4.24973	3.67278	6.25975	Level 3	-2.28	0.721285	-0.00730705
CHON	Aromatics	ESI+	1,3-Dimethyl-1,5-dihydrofuro[3,4-d]pyrimidine-2,4,7(3H)-trione	C8H8N2O4	197.057	10.878	[M+H]+1	0.666294	1.41954	1.85947	1.99941	1.4909	2.30531	2.31151	1.76098	1.37229	2.03004	1.59654	0.510178	0.561125	0.42744	0.889445	0.945172	0.928899	0.84093	0.817699	0.809175	1.18134	0.890374	0.803009	0.849614	1.49553	1.33683	0.983705	1.03556	1.42368	Level 3	4.77	0.616525	-0.00929322
CHO	Aromatics	ESI+	2,3-Dihydro-1H-phenalene-1,2-dione	C13H8O2	197.059	11.09	[M+H]+1	0.214987	0.46169	1.24115	0.473164	0.711395	7.22527	0.83085	0.432083	0.50168	0.2006	0.382526	0	0.904918	0	0.166398	0	0.334563	0	0	0.22766	0.089038	0.314065	0	0	0.479304	0.340031	0	0	0.123572	Level 2	-4.9
CHO	Aromatics	ESI+	6H-Benzo[c]chromen-6-one	C13H8O2	197.059	13.29	[M+H]+1	2.38493	5.42305	7.75316	6.66603	7.70126	3.83313	10.7506	3.80027	3.43626	4.22148	4.58458	3.73585	1.61544	1.70596	4.07112	2.96041	3.57648	1.37189	2.43795	2.97664	3.14276	3.85454	2.664	3.13983	4.5189	4.85907	4.06966	2.98422	5.958	Level 2	-2.58
CHO	Aromatics	ESI+	2,4,5-Trimethoxybenzaldehyde	C10H12O4	197.08	0.912	[M+H]+1	8.43063	8.99455	15.823	10.727	9.41781	0	44.0321	18.8734	19.4899	15.0612	11.8017	10.2289	0	9.70785	12.3896	11.5882	22.2573	14.9319	9.14463	9.91896	11.9611	8.72713	7.46492	6.48476	12.5242	13.7309	10.7236	8.76679	12.6	Level 2	-5.16
CHO	Aromatics	ESI+	Acetosyringone	C10H12O4	197.08	7.009	[M+H]+1	7.52767	10.2868	20.691	11.397	8.37353	5.30436	45.193	24.6641	13.0223	11.9153	11.1778	10.513	0.687217	10.1217	12.1075	10.8266	23.5649	14.6013	13.5981	7.83484	8.19479	5.59861	6.76497	7.57988	9.26502	8.46679	7.38493	6.45267	7.20322	Level 2	-2.75
CHN	Aromatics	ESI+	Dibenzylamine	C14H15N	198.127	6.768	[M+H]+1	0.00452467	1.75187	4.35287	3.41854	3.62803	46.6133	3.00262	1.93297	2.30806	0.351383	0.843606	0.977887	8.4647	0.0102291	0.00450892	0.0115875	0.327055	0.0158686	0.358314	0.210777	2.87552	0.357288	0.880753	11.1519	0.635566	9.36431	0.459851	0.24249	2.83766	Level 2	-2.91
CHN	Aromatics	ESI+	2,2-Diphenylethanamine	C14H15N	198.127	0.973	[M+H]+1	0.00452467	6.31015	12.1078	11.2445	11.9598	38.2078	10.2193	6.64228	12.0532	1.66827	3.85994	4.25752	9.29973	0.00444562	0.0391913	0.138391	1.46598	0.075379	1.87677	1.51711	16.7721	2.78279	5.65202	35.6004	4.05314	56.1202	3.49942	2.08064	14.5682	Level 2	-2.05
CHO	Aromatics	ESI+	Dibenzo[b,d]furan-1,4-dione	C12H6O3	199.038	10.623	[M+H]+1	2.24785	3.6016	4.57756	7.82085	6.58717	2.19033	10.1648	3.00998	5.09531	3.74945	3.55944	3.59058	14.4566	3.69912	3.79228	3.53927	3.32341	2.89398	2.89108	3.69473	7.3694	7.34023	3.22089	2.33532	5.43539	8.72503	5.99074	4.38126	7.06107	Level 2	-2.69
CHO	Aromatics	ESI+	1,8-Naphthalic anhydride	C12H6O3	199.038	0.982	[M+H]+1	5.24679	14.5451	19.2674	25.5748	22.4289	138.071	35.7983	11.599	11.6077	12.1584	13.8185	10.2457	0.807446	6.66398	12.0533	11.6969	11.1169	6.20364	8.1423	8.60319	13.9356	16.3369	6.66812	7.33238	13.1631	16.7282	10.5891	8.53432	15.9943	Level 1	-2.66
CHON	Aromatics	ESI+	Mimosine	C8H10N2O4	199.072	0.948	[M+H]+1	3.13207	6.41094	10.6069	8.58299	8.10381	11.627	10.828	5.95762	5.26449	6.79709	6.7859	3.24745	2.42521	2.15052	2.02998	1.68811	1.96198	1.51788	2.78232	3.70209	4.02312	4.32053	3.90423	4.66307	8.85556	6.17112	5.11492	4.61599	8.10384	Level 2	4.49	0.951274	-0.0319892
CHO	Aromatics	ESI+	3-(1-Naphthyl)acrylic acid	C13H10O2	199.075	13.363	[M+H]+1	0.204445	0.889731	1.15912	1.07748	0.576463	17.5887	0.645046	0.216678	0.0315038	0.115628	0	0.375556	2.00489	0	1.24508	0.36325	0.814959	0	0.0551107	0.710599	0	0.512358	0.753527	0.772824	0.910047	0.28005	0.451423	0.105842	0.261631	Level 2	-2.37
CHO	Aromatics	ESI+	2-Naphthylacrylic acid	C13H10O2	199.075	12.942	[M+H]+1	0.49927	0.780145	1.26902	0.936321	0.668682	9.17643	0.695957	0.0234325	0.260993	0.00283739	0	0.37061	0.429458	0.111585	1.16504	0.552194	0.904276	0	0.178909	1.26172	0.338081	0.788381	0.973248	0.852263	1.36201	0.823435	1.08234	0.395808	0.779431	Level 2	-2.19
CHO	Aromatics	ESI+	7-Methoxynaphtho[2,1-b]furan	C13H10O2	199.075	10.648	[M+H]+1	4.48328	5.51057	5.58609	5.80953	3.68767	18.225	5.49275	1.56998	5.51379	1.2798	2.35291	3.07412	3.06695	2.17957	7.29602	5.36923	6.62314	2.60394	3.67998	8.51548	7.09113	8.23897	8.92047	7.49848	7.1011	8.38765	5.41813	4.00601	3.86161	Level 3	-1.92
CHO	Aromatics	ESI+	Methyl 2-hydroxy-3-naphthoate	C12H10O3	203.07	11.353	[M+H]+1	1.24837	3.85862	7.27622	4.71946	5.04343	22.6537	5.55066	1.76475	1.44326	1.19673	1.93113	1.82925	1.03472	0.615187	2.64099	1.55639	2.45938	0.635903	0.773555	1.43326	1.34318	1.34996	0.947066	1.69377	3.71987	4.05816	1.90242	1.78259	4.50793	Level 3	-3.01
CHON	Aromatics	ESI+	3-Hydroxy-2,3-dihydropyrrolo[2,1-b]quinazolin-9(1H)-one	C11H10N2O2	203.081	0.928	[M+H]+1	0.251703	0.470287	1.03579	0.855597	0.694234	1.99636	0.474429	0.224555	0.525028	0.0556846	0.218731	0.0882164	0	0.157595	0.286108	0.100333	0.193008	0.0798986	0.105946	0.299944	1.28531	0.130079	0.217622	0.359309	0.636048	3.6315	0.554187	0.23908	1.01975	Level 3	-3.53	0.658582	0.0175381
CHO	Aromatics	ESI+	5-Ethyl-3-(4-methylphenyl)-2,5-dihydrofuran-2-one	C13H14O2	203.106	12.473	[M+H]+1	10.4168	15.5126	26.2923	17.2251	17.0688	58.5362	25.8808	14.2972	12.9191	15.3933	18.1181	20.2914	8.30098	7.24415	14.1856	12.0771	16.0589	8.58868	9.1048	14.1667	14.1102	11.5718	12.9353	16.0853	23.4104	19.1534	14.1352	10.1502	17.3905	Level 3	-3.71
CHON	Aromatics	ESI+	Indole-3-pyrubate	C11H9NO3	204.065	0.994	[M+H]+1	0.336675	0.345316	1.41896	0.873383	0.745383	0.659074	1.18874	0.275676	0.641595	0.376814	0.47502	0.341694	0	0.24928	0.413264	0.1817	0.380465	0.112832	0.236992	0.614534	0.549383	0.858714	0.405619	0.307745	0.86608	1.87253	0.546172	0.44218	1.02691	Level 2	-4.6	0.192061	-0.00609607
CHON	Aromatics	ESI+	6-Methyl-N-(2H-1,2,3,4-tetrazol-5-yl)pyridine-2-carboxamide	C8H8N6O	205.083	0.982	[M+H]+1	8.86419	12.6298	35.6672	33.9227	26.5626	10.6511	28.6295	10.3407	14.4721	9.76825	8.65891	10.2214	1.48056	8.63901	9.72937	9.82843	9.70993	7.49887	6.85161	13.3811	13.5418	12.8231	14.8404	11.4478	23.9718	37.5549	26.2375	20.0093	28.1044	Level 3	-2.61	0.396716	-0.00849822
CHO	Aromatics	ESI+	9,10-Phenanthraquinone	C14H8O2	209.059	11.765	[M+H]+1	1.55523	1.76238	1.86388	2.06783	2.28353	6.82152	3.98964	1.82788	1.76752	2.38234	2.81339	2.42886	0	1.59386	1.80662	1.87154	1.97143	1.9722	2.10165	2.20864	2.77282	2.16678	2.01647	1.96692	2.36075	2.48606	2.42762	2.47299	2.68601	Level 1	-3.46
CHON	Aromatics	ESI+	2-(2-Methoxyphenoxy)propanehydrazide	C10H14N2O3	211.107	0.994	[M+H]+1	0.956953	1.06288	2.8342	1.55812	1.61761	2.64453	3.28902	1.63162	1.5305	0.974914	1.21341	1.14166	0.616294	0.679095	0.917206	0.78654	0.983843	0.654955	0.772438	0.849737	1.37907	0.842791	0.826826	0.956112	1.05037	2.01915	1.30467	1.20531	1.79058	Level 2	-4.03	1.09945	-0.0289883
CHON	Alicyclics	ESI+	3-(Butan-2-yl)-1-hydroxy-3H,4H,6H,7H,8H,8aH-pyrrolo[1,2-a]pyrazin-4-one	C11H18N2O2	211.144	0.99	[M+H]+1	4.10027	6.4592	11.4492	7.59311	9.88886	27.1651	8.44921	4.42363	6.16257	2.41262	3.20395	3.30477	2.00172	2.96332	3.9874	3.04776	6.08483	2.50055	3.8626	5.2676	9.67002	4.29656	4.68381	7.08896	7.68095	14.5616	6.71801	6.41084	9.67467	Level 2	-2.01	0.464086	-0.0139403
CHON	Aromatics	ESI+	2-Methoxy-5-methylpyrimidine-4,6-dicarboxylic acid	C8H8N2O5	213.052	0.965	[M+H]+1	9.63125	15.4903	26.4583	16.5338	16.7298	70.7726	33.6797	12.2011	14.1703	9.16693	11.5083	9.09616	3.51078	2.61049	3.42596	3.3529	3.47896	2.30126	9.1381	14.3388	16.1914	15.3432	10.9577	15.0891	25.3806	17.7506	12.0641	11.5379	15.7091	Level 2	5.98	1.14578	-0.0389319
CHO	Aromatics	ESI+	4-Methyl-1H,3H-benzo[de]isochromene-1,3-dione	C13H8O3	213.054	10.623	[M+H]+1	1.92926	4.92344	6.23209	7.08283	7.06738	49.925	18.9621	6.9021	6.72092	5.48752	6.75813	4.90534	3.71111	1.36767	3.62106	3.24431	3.80854	1.67246	3.47921	4.21558	5.24715	5.81273	3.17373	4.31735	7.48215	5.23723	3.40908	2.60559	5.34843	Level 2	-3.84
CHON	Aromatics	ESI+	1-Butyl-2,6-dioxo-1,2,3,6-tetrahydro-4-pyrimidinecarboxylic acid	C9H12N2O4	213.088	1.075	[M+H]+1	8.56237	15.489	24.2025	20.9698	21.3957	41.8723	27.4066	13.2797	14.2564	15.0257	16.0945	13.9638	8.48464	3.01631	3.10032	2.90182	3.40149	1.83648	1.59392	4.77098	4.34148	4.29945	5.13597	3.73981	6.93186	14.2152	12.8763	10.9658	18.019	Level 3	3.88	0.975423	-0.0327049
CHO	Aromatics	ESI+	5-[(E)-2-Phenylethenyl]benzene-1,3-diol	C14H12O2	213.091	13.837	[M+H]+1	4.00612	4.23401	7.00051	3.62407	3.91736	35.0339	9.0813	2.55139	4.6971	1.98052	2.32643	2.41088	3.01399	1.29975	3.91549	2.62077	4.99221	0.9393	2.69261	5.4967	3.74734	4.10312	4.10154	5.20178	7.89295	5.44664	4.18476	3.06871	5.21223	Level 2	-2.22
CHO	Aliphatics	ESI+	Propanoic acid, 2-methyl-, 3-hydroxy-2,2,4-trimethylpentyl ester	C12H24O3	217.179	14.779	[M+H]+1	2.5166	4.54335	8.99305	13.0579	25.8558	32.5972	10.2132	6.73479	4.31168	6.48184	6.03226	9.39115	12.5771	0.691347	2.71838	1.68351	7.07245	1.15661	2.46336	0.619864	0.523438	0.819273	0.564376	0.412671	1.85152	0.421921	0.423112	1.34258	2.99435	Level 3	-2.83
CHON	Aromatics	ESI+	2-(3,4-Dimethoxybenzyl)-4,5-dihydro-1H-imidazole	C12H16N2O2	221.128	1.056	[M+H]+1	0.404097	0.49507	1.715	0.899752	1.21028	2.9325	0.918347	0.567905	0.737907	0.286964	0.392497	0.203526	0.016252	0.133116	0.245035	0.212395	0.256067	0.0028694	0.313477	0.687601	0.917214	0.394307	0.505515	0.909642	0.815977	2.9609	0.809543	0.515938	1.65411	Level 2	-3.94	0.565125	-0.000352344
CHON	Aromatics	ESI+	3,4,5-Trimethoxybenzhydrazide	C10H14N2O4	227.103	11.57	[M+H]+1	5.52106	8.68972	12.3747	9.98014	9.03149	15.6525	14.1334	5.8041	6.70816	6.16798	6.95842	6.65622	5.18429	2.15572	5.46547	5.42618	6.18299	2.58033	4.59203	6.40006	4.04092	5.0478	6.33695	8.5704	12.085	11.3211	8.78902	6.99783	11.9337	Level 3	3.37	0.849007	-0.0281317
CHNS	Aromatics	ESI+	2-[(4,5-Dihydro-1,3-thiazol-2-ylsulfanyl)methyl]benzonitrile	C11H10N2S2	235.036	12.057	[M+H]+1	2.90239	7.38324	12.8886	7.69154	8.7867	69.8518	12.0454	3.09886	2.39541	2.49265	3.863	1.8368	0.00235849	0.571609	4.83713	3.78365	5.34452	0.330171	2.30948	3.7607	3.46708	4.74782	2.46648	5.39985	9.39958	9.22552	5.09181	4.01178	11.3553	Level 2	-0.81
CHON	Aromatics	ESI+	1-(2,4-Dihydroxyquinolin-3-yl)ethan-1-one	C11H9NO3	236.09	0.876	[M+H+MeOH]+1	0.631079	0.762475	1.1817	1.05912	0.964911	1.58944	1.61911	0.569411	0.898817	0.669431	0.92236	0.560181	0.413332	0.464814	0.666616	0.36308	0.600674	0.500912	0.488744	0.876185	1.20372	0.989727	0.796313	0.510833	1.11155	1.6204	0.994269	0.77405	1.2767	Level 2	-7.27	1.28452	-0.0318961
CHON	Aromatics	ESI+	Methyl 4-acetamido-2-ethoxybenzoate	C12H15NO4	238.106	1.028	[M+H]+1	0.744235	0.889629	1.51799	1.1531	1.45166	2.44995	4.82871	2.13213	2.10937	2.51774	3.21101	2.0074	0	0.590875	0.809495	0.625151	0.746052	0.633003	1.1369	1.59615	2.05221	1.66756	1.38116	1.04593	1.76437	2.85258	2.27035	1.85957	2.39148	Level 3	-4.29	1.1918	-0.0287792
CHONS	Aliphatics	ESI+	Methyl N-(thioxomethylene)methioninate	C7H11NO2S2	247.057	1.022	[M+ACN+H]+1	2.44437	2.85743	6.0644	4.05469	4.40378	30.2878	7.57848	2.41521	3.46723	2.25319	2.83803	2.17155	2.26351	1.41283	2.26384	2.08919	2.1461	1.23741	1.90787	3.86807	3.56194	4.07215	2.49884	2.37491	5.44647	4.44377	3.65125	2.80621	4.55965	Level 2	1.86
CHO	Aromatics	ESI+	2-(4-Methylbenzylidene)-1H-indene-1,3(2H)-dione	C17H12O2	249.09	13.439	[M+H]+1	0	0	0	0	0	1.49777	0.626724	0	0	0	0	0.0500328	0	0	0	0	0	0	0	0.243147	0	0.219652	0	0.0639579	1.01064	0	0	0	0.0403984	Level 2	-4.32
CHO	Aromatics	ESI+	5-Phenyl-3-(phenylmethylene)furan-2(3H)-one	C17H12O2	249.09	15.909	[M+H]+1	1.98305	2.62491	4.68374	2.56505	3.34217	18.6839	6.87461	1.76972	2.45532	1.50494	1.79763	2.9476	1.9375	0.85112	1.96789	1.38418	2.45223	0.593588	1.53389	2.61181	2.03662	2.19231	1.52562	1.57419	4.00943	3.55579	2.57758	2.37558	4.25193	Level 2	-3.09
CHONS	Aromatics	ESI+	2-Morpholinothiobenzothiazole	C11H12N2OS2	253.046	10.622	[M+H]+1	5.77123	12.3032	16.8296	19.6064	16.235	137.108	24.7142	7.40208	9.0082	8.02528	9.55486	7.44919	12.5154	5.62223	9.17712	8.40402	8.32063	4.0925	5.99513	8.38558	12.173	14.1239	5.83219	5.98568	12.9622	15.4372	9.41807	7.22189	13.9991	Level 3	-0.72
CHON	Aromatics	ESI+	Michler's ketone	C17H20N2O	269.164	14.576	[M+H]+1	0	2.58843	12.2269	1.2318	2.07418	8.42125	4.65136	0	0.147728	0	0.510307	0	12.1724	0.991713	0.326731	3.63845	0.540781	0	0.392253	1.71923	0	0	0	0	0	0	0	0	0.376015	Level 2	-4.54	1.09543	0.0346011
CHON	Aliphatics	ESI+	Lauroylsarcosine	C15H29NO3	272.221	16.888	[M+H]+1	0	18.7568	0.327774	0.82502	0.369692	1.25182	4.18167	0.515286	0	0.185502	0	1.6711	17.368	0.790806	0	0.577266	0	0	1.27155	0	0	0.920358	0.0705793	0	0.0926204	1.07375	0.976113	0.350601	3.08521	Level 2	-2.04	0.320145	-0.00278443
CHO	Aromatics	ESI+	9-Hydroxy-1,4a-dimethyl-7-(prop-1-en-2-yl)-1,2,3,4,4a,9,10,10a-octahydrophenanthrene-1-carboxylic acid	C20H26O3	315.194	16.48	[M+H]+1	1.08616	2.40452	3.03745	4.44101	3.94509	14.0428	5.06178	3.21866	1.84749	2.78973	4.47544	3.77522	6.78549	0.716891	1.62631	3.05652	1.93336	1.47339	2.60211	5.00946	4.56636	1.60821	4.15211	2.3898	8.11976	3.99228	2.26675	3.07655	3.37961	Level 2	-3.96
CHN	Aliphatics	ESI+	bis(decyl)(ethyl)amine	C22H47N	326.377	16.704	[M+H]+1	0	0.0710741	0.490669	0	0	0	0	0	0	0	0	0	0.168729	0	0.053737	0	0	0.18735	0.384058	0	0	0	0	0.127797	4.58278	0.582524	0	0	0	Level 2	-3.71
CHO	Aromatics	ESI+	2-[1-(2H-1,3-benzodioxol-5-yl)propan-2-yl]-6-methoxy-4-(prop-2-en-1-yl)phenol	C20H22O4	327.158	12.011	[M+H]+1	0.674413	0.998899	1.58309	1.18255	1.42146	7.5829	2.18796	0.753005	0.957021	0.710153	0.97037	0.721129	0.662433	0.583903	0.703927	0.833608	0.673476	0.634513	0.671492	0.868908	0.887819	0.600128	0.645753	0.754136	1.61124	1.44953	0.825999	1.08778	1.25169	Level 2	-4.56
CHON	Aromatics	ESI+	Ethyl 2-(4-methyl-1-piperazinyl)-4-oxo-6-(3,4,5-trimethoxyphenyl)-1,4,5,6-tetrahydro-5-pyrimidinecarboxylate	C21H30N4O6	435.226	15.325	[M+H]+1	0.0868767	0.111958	0.224001	0.146053	0.0957237	0	0.19794	0.0993203	0.1255	0.0915089	0.0924348	0.0933568	0	0.085359	0.13352	0.0888918	0.122056	0.0903655	0.0887858	0.0861429	0.107663	0.0843561	0.0833911	0.0848801	0.0870521	0.0867827	0.0870276	0.0924178	0.101027	Level 2	3.89	1.15111	-0.0194836
CHO	Aliphatics	ESI+	2-(Palmitoyloxy)-2-propen-1-yl stearate	C37H70O4	579.533	19.688	[M+H]+1	0	2.92679	19.3822	19.3677	26.1006	26.0701	36.1388	21.9986	4.0797	38.8276	14.5046	17.3399	15.1124	5.29629	18.7379	16.5916	27.4304	20.9098	15.1392	24.2086	20.5662	17.6892	0.179954	13.8649	25.7081	17.0096	17.7597	25.8678	15.0644	Level 2	-2.37
CHO	Aromatics	ESI-	2-Formyl-5-methylphenol	C8H8O2	135.044	8.004	[M-H]-1	0.62146	0.64197	0.9144	0.68508	0.652542	1.60149	1.3174	0.611021	0.623195	0.619887	0.618493	0.61948	0.592501	0.574719	0.585509	0.600298	0.632501	0.614941	0.608874	0.604914	0.77448	0.585541	0.581116	0.611757	0.71494	0.705311	0.686393	0.650097	0.710542	Level 2	-6.62
CHO	Aromatics	ESI-	2-Methylbenzoic acid	C8H8O2	135.044	1.12	[M-H]-1	14.4478	13.8437	26.0353	15.2367	12.715	20.8786	24.0276	11.9445	15.0975	10.2353	5.82643	7.97415	0	7.61114	19.0723	9.50592	13.7287	7.19428	9.5365	15.6379	19.8109	24.0678	18.2229	14.3636	16.2209	25.5059	17.4979	14.3277	18.846	Level 2	-4.28
CHO	Aromatics	ESI-	3,5-Dihydroxybenzaldehyde	C7H6O3	137.023	8.726	[M-H]-1	0.739818	1.21253	1.89337	2.06599	1.98063	4.91667	2.64679	0.806963	1.09192	0.819395	0.837136	0.711465	0.595023	0.656472	0.710155	0.820559	0.769542	0.648151	0.703423	0.911041	1.39581	1.10638	0.733442	0.715245	1.17979	1.65643	1.03385	0.839398	1.43526	Level 2	-7.18
CHO	Aromatics	ESI-	2,4-Dihydroxybenzaldehyde	C7H6O3	137.023	2.913	[M-H]-1	1.16087	1.49122	3.87592	2.32693	2.58464	6.99653	3.6724	0.970864	2.42811	0.751425	0.841421	0.648499	0.835401	0.654771	0.934967	0.968502	1.24411	0.684933	0.84572	1.27537	1.11375	0.916004	0.839911	0.879067	2.74438	2.05396	1.44313	1.26526	2.21611	Level 2	-7.09
CHO	Aromatics	ESI-	2,6-Dihydroxybenzaldehyde	C7H6O3	137.024	1.136	[M-H]-1	8.19485	8.87918	16.4802	11.2371	12.0004	2.15658	19.5192	7.27082	12.5063	4.87816	4.94862	3.52532	0	4.79822	9.16557	7.3867	8.40959	3.81266	6.29937	9.98427	8.37528	10.694	7.13846	6.28436	13.0627	15.2701	10.6032	10.1224	12.3949	Level 2	-5.82
CHON	Aromatics	ESI-	4-Nitrophenol	C6H5NO3	138.019	7.673	[M-H]-1	23.2131	97.7125	103.341	133.9	114.116	268.668	130.628	31.7854	76.5851	39.6404	47.7921	15.5158	7.2806	37.1985	20.5241	62.1007	50.5914	37.8159	22.4892	28.973	37.7439	16.5888	9.11073	23.5418	101.814	52.5161	45.9471	41.3951	64.8697	Level 1	-6.55	0.771006	0.0189293
CHON	Aromatics	ESI-	2-Nitrophenol	C6H5NO3	138.019	1.124	[M-H]-1	32.6594	82.5379	62.6491	98.3517	89.6251	12.5586	127.523	48.0505	69.177	64.8848	56.9349	36.7268	0.963973	75.3613	88.5046	93.8688	72.8327	67.6661	40.9157	47.0259	67.2191	68.0676	23.6945	40.5319	89.0315	96.9493	61.9859	61.4295	62.7203	Level 1	-5.27	0.864876	0.0217032
CHO	Aromatics	ESI-	4-Hydroxyphenylacetic acid	C8H8O3	151.039	11.201	[M-H]-1	0.505828	1.44452	4.22421	2.30883	1.9078	9.10507	1.97551	0.523944	1.2044	0.466036	0.432707	0.288193	0.198555	0.294533	0.348913	0.476884	0.661096	0.270672	0.437987	0.792373	1.01716	0.947086	0.430086	0.426908	1.97626	1.79614	1.13995	0.650642	1.67502	Level 2	-6.42
CHO	Aromatics	ESI-	4-Hydroxy-3-methylbenzoic acid	C8H8O3	151.039	12.034	[M-H]-1	1.07552	5.36467	12.1675	10.3021	9.2279	46.3101	9.17238	2.32529	4.62562	1.11564	1.90575	0.363469	0	0.464806	0.948329	1.51548	2.03951	0.734536	1.305	3.04276	5.0314	4.23299	1.43307	0.940895	5.45104	6.34697	4.60088	2.11182	7.97147	Level 2	-6.01
CHO	Aromatics	ESI-	2-(Hydroxymethyl)benzoic acid	C8H8O3	151.039	1.132	[M-H]-1	5.95526	6.69126	12.1632	7.81967	6.97215	7.75754	11.5224	4.99494	7.99395	3.33093	3.12934	3.05941	1.04743	3.62629	6.85036	4.81004	6.19347	3.03562	5.02031	6.9267	8.01152	8.15473	6.01706	4.86612	8.42618	10.5165	7.74032	6.50864	8.07494	Level 2	-4.87
CHON	Aromatics	ESI-	3-methyl-4-nitrophenol	C7H7NO3	152.034	10.668	[M-H]-1	14.2194	45.6194	45.8552	50.6394	53.5719	99.5866	52.7097	13.6375	28.3723	15.3825	20.3031	7.15706	3.84612	14.7572	11.3704	25.6359	25.4593	11.2333	9.55791	15.1308	16.1486	7.28207	6.10714	16.9346	61.088	30.6259	25.7628	19.7534	30.7282	Level 2	-6.17	1.18886	0.0263226	ü
CHON	Aromatics	ESI-	2-methyl-4-nitrophenol	C7H7NO3	152.034	9.905	[M-H]-1	14.3478	42.4523	43.0203	44.4041	49.6951	81.3304	52.1968	15.2677	28.3429	13.7448	16.4279	6.50895	2.3837	17.1059	11.477	25.069	25.4593	11.2333	9.55791	16.2719	18.4372	7.54568	7.0877	17.3607	58.7187	25.8254	23.0553	20.3046	32.6311	Level 2	-6.12	1.17293	0.0250938	ü
CHON	Aromatics	ESI-	3-methyl-2-nitrophenol	C7H7NO3	152.035	1.122	[M-H]-1	17.0462	30.2605	23.5644	29.3768	29.9274	0.435259	40.239	17.7763	20.0554	18.8441	16.4907	12.8021	0.0202695	24.6148	41.304	28.9721	27.3706	18.5898	16.2751	19.9638	25.2903	27.5927	14.2148	20.3613	38.0507	42.1632	25.4396	23.2268	23.4725	Level 2	-4.67	1.07111	0.0306797	ü
CHO	Aromatics	ESI-	Gentisic acid	C7H6O4	153.019	1.141	[M-H]-1	4.15277	8.85159	20.3898	16.7671	14.7399	27.9883	27.1503	10.0953	17.0869	7.58952	8.84652	8.20726	0.768037	2.9899	10.8086	7.327	8.92936	4.441	7.56183	11.3875	15.3987	19.8374	5.24576	3.65846	13.1225	27.5234	13.5138	9.9367	18.0581	Level 2	-4.4
CHON	Aromatics	ESI-	4-Nitrocatechol	C6H5NO4	154.014	5.466	[M-H]-1	13.6355	41.7745	71.0924	43.5904	47.9766	80.0375	41.1272	8.91112	26.7036	2.87863	7.40055	1.1064	0.093293	3.36954	7.02144	8.73536	14.9594	1.34848	7.78442	11.3563	6.0024	5.48693	3.76411	6.30966	42.5193	22.6661	12.9493	12.3376	25.4597	Level 1	-6.1	1.26394	0.0164115	ü
CHON	Aromatics	ESI-	3-Nitrocatechol	C6H5NO4	154.014	1.137	[M-H]-1	68.2755	162.855	238.949	155.406	204.505	44.5886	324.319	87.2439	213.135	32.9796	62.274	20.8768	0.667198	39.7182	137.331	81.7198	106.62	20.9159	69.2646	97.0256	63.7151	123.533	42.5781	58.609	263.026	351.506	124.477	128.225	210.461	Level 2	-5.11	1.45683	0.0405881	ü
CHON	Aromatics	ESI-	2-Nitro-1H-indole	C8H6N2O2	161.035	10.439	[M-H]-1	0.560105	0.727204	0.190956	0.393289	0.797768	0.0625568	0.226716	0.487427	0.296367	0.946474	1.13335	1.06705	0	0	0.00746199	0.125258	0.417445	0.117237	0.0224954	0	0	0	0	0.015187	0.336372	0.257802	0.306004	0.413569	0.454722	Level 2	-6.13	1.07053	-0.0326599
CHO	Aromatics	ESI-	2-(2-Oxoethyl)benzoic acid	C9H8O3	163.039	1.13	[M-H]-1	5.52915	5.29942	9.17081	6.30279	5.92595	8.35732	9.18334	4.78656	5.78845	2.97132	3.16227	2.92015	0.944005	3.29679	5.45769	4.06984	5.66015	2.76101	3.5688	5.23777	5.7856	6.55623	5.27149	4.41577	6.60032	8.23818	6.6108	5.1594	7.0541	Level 2	-4.58
CHO	Aromatics	ESI-	Phthalic acid	C8H6O4	165.019	1.162	[M-H]-1	13.6833	29.1258	44.5678	41.0718	49.7031	40.0269	58.2338	23.0033	34.0228	23.5435	34.2642	23.6006	3.01668	11.2421	24.6222	20.4212	20.3613	15.0353	18.625	25.4927	38.6572	39.7647	15.0381	10.4112	30.1204	60.3132	25.0398	18.4655	46.2683	Level 2	-4.49
CHO	Aromatics	ESI-	2-(1-Hydroxyethyl)benzoic acid	C9H10O3	165.055	1.104	[M-H]-1	60.0377	60.7481	161.722	91.302	71.9629	168.09	102.515	45.6839	72.1252	23.1138	24.5625	21.2218	0.927866	28.7499	61.738	40.1825	50.6872	19.9943	31.9037	57.1208	47.9861	62.8272	56.0574	44.9296	68.4165	101.616	74.065	55.706	88.7721	Level 2	-4.33
CHON	Aromatics	ESI-	2,4-Dimethyl-6-nitrophenol	C8H9NO3	166.05	11.362	[M-H]-1	2.36956	6.30586	6.73146	7.02761	9.21306	18.4858	8.58142	1.96755	4.02266	2.13782	3.61017	2.01412	0.692564	2.49992	1.57198	3.58716	3.94485	1.31874	1.77355	2.32738	2.44263	0.866799	1.30272	2.96847	9.68538	3.85197	3.86532	2.97123	5.17861	Level 2	-5.6	0.854485	0.0120637
CHON	Aromatics	ESI-	3,6-Dimethyl-2-nitrophenol	C8H9NO3	166.05	12.463	[M-H]-1	5.76587	15.6446	18.4491	16.5588	19.1899	14.855	19.9562	4.98978	10.3595	4.05951	5.22672	2.26192	0.455739	5.28832	5.03699	8.30334	9.45083	2.86632	3.98462	6.05003	6.20691	3.2716	3.28154	7.79179	24.3484	15.9797	9.68767	7.36943	13.5621	Level 2	-5.6	1.5491	0.0318261	ü
CHON	Aromatics	ESI-	2,6-Dimethyl-4-nitrophenol	C8H9NO3	166.05	11.771	[M-H]-1	9.3181	23.7104	27.0443	24.142	29.1779	50.2938	31.8614	8.06794	15.3612	6.47963	8.48558	5.03987	2.67248	9.50008	6.91857	13.9909	15.5019	5.23584	7.93784	10.9276	11.1321	4.2833	6.43525	12.8172	38.1482	16.6372	15.2532	12.4597	21.9132	Level 1	-5.49	1.27123	0.0230416	ü
CHON	Aromatics	ESI-	3-Ethyl-2-nitrophenol	C8H9NO3	166.05	1.106	[M-H]-1	5.25385	7.82912	6.71552	7.3814	7.68556	3.61925	10.4895	4.83026	5.07101	4.35087	3.78818	3.79271	1.97441	6.67329	14.5677	7.21236	7.68583	4.62795	5.23078	6.37898	7.73365	8.86995	5.61025	6.11869	10.3164	14.7296	7.11925	6.67502	7.2733	Level 2	-3.43	1.05995	0.0303108	ü
CHO	Aromatics	ESI-	2-Hydroxy-4-methoxyphenyl formate	C8H8O4	167.034	1.128	[M-H]-1	1.46496	1.57091	2.79592	2.13179	1.95497	2.44748	3.50408	1.58638	2.27189	1.30893	1.24369	0.963533	0.65339	1.01965	1.68551	1.43431	1.59933	1.06029	1.42028	1.81051	1.97808	2.13291	1.28063	1.12534	2.30063	2.61585	1.89482	1.69702	2.23561	Level 2	-3.99
CHO	Aromatics	ESI-	2,6-Dimethylol-p-cresol	C9H12O3	167.071	1.134	[M-H]-1	0.874152	0.827975	1.11529	0.945664	0.851094	1.12841	1.72979	0.804614	0.938131	0.763041	0.744396	0.722426	0.62101	0.75508	0.968073	0.893001	0.90935	0.740768	0.767946	0.980635	0.995621	1.0408	0.938208	0.904881	1.01097	1.12436	0.997615	0.902016	1.04955	Level 2	-4
CHON	Aromatics	ESI-	3-Methyl-5-nitrocatechol	C7H7NO4	168.029	9.6	[M-H]-1	10.2712	23.6634	46.8483	26.0639	30.6022	53.6663	40.3064	6.8832	19.9492	5.18587	1.62953	0.480441	0.0684485	1.9652	5.12129	8.15364	12.7904	1.53614	6.00656	10.2863	5.03894	2.90716	4.49502	6.84233	42.9688	17.4761	13.5771	12.9926	29.8845	Level 2	-5.29	1.43318	0.0208502	ü
CHON	Aromatics	ESI-	4-Methyl-5-nitrocatechol	C7H7NO4	168.029	7.942	[M-H]-1	14.1807	30.5176	51.7488	33.2607	27.9169	49.5208	39.6766	8.35583	22.0842	6.18225	2.26564	1.9608	2.67635	4.64265	6.56679	12.8237	16.6582	4.79441	9.51999	12.7278	11.1678	4.00889	6.02879	9.59925	48.8674	21.5661	16.4731	16.5777	27.5863	Level 1	-4.46	1.41632	0.0234531	ü
CHON	Aromatics	ESI-	4-Methyl-2-nitrobenzene-1,3-diol	C7H7NO4	168.029	1.126	[M-H]-1	35.3064	59.4664	90.4966	63.966	83.6975	6.65581	120.18	33.9644	69.7531	26.4096	16.1971	6.35151	0.326243	14.6738	59.6812	38.2632	47.8406	13.2414	30.1073	43.9727	29.3436	37.9995	22.5138	26.9088	109.355	134.365	51.9738	55.7883	88.2203	Level 2	-4.47	1.74443	0.0505927	ü
CHO	Aromatics	ESI-	2,6-Dimethoxybenzene-1,4-diol	C8H10O4	169.05	1.128	[M-H]-1	0.888799	0.889428	1.25426	1.01043	1.11975	2.30718	2.20291	0.928579	1.13665	1.03068	1.12208	0.831872	0.630785	0.769442	1.01073	0.920078	1.00694	0.871452	0.870839	1.10122	1.36116	1.39593	0.92315	0.862854	1.14011	1.29758	1.13253	1.03961	1.34447	Level 2	-4.39
CHO	Aromatics	ESI-	2-(1-Oxopropan-2-yl)benzoic acid	C10H10O3	177.055	1.12	[M-H]-1	3.00857	3.18006	6.36535	3.79633	3.48354	10.5087	5.01629	2.45837	3.05073	1.78747	1.80666	1.31832	0.702244	1.86127	3.17947	2.44637	2.89934	1.68966	2.14214	3.02759	3.27032	3.43596	2.82837	2.46524	3.67429	4.54138	3.48721	2.94994	4.04009	Level 2	-4.18
CHON	Aromatics	ESI-	2-Nitrobenzofuran-7-ol	C8H5NO4	178.014	9.44	[M-H]-1	1.52686	5.93956	6.59743	5.81586	8.11787	4.21771	7.49347	1.14058	3.14889	1.55663	0.355157	0.0253494	0.273277	1.0364	0.620562	2.21641	2.76313	0.37711	0.784242	1.25427	0.800703	0.0585876	0.217193	0.787656	9.74913	17.5198	10.1873	10.1976	14.1558	Level 2	-5.22	1.26083	0.029406	ü
CHON	Aromatics	ESI-	2-Nitrobenzofuran-5-ol	C8H5NO4	178.014	10.084	[M-H]-1	3.13344	9.6589	9.80104	9.92493	14.0618	13.2921	12.5364	2.36373	6.00741	5.41614	1.45348	0.309509	0.273277	4.38049	2.06993	5.90284	5.0422	1.54766	1.86252	3.77617	2.33752	0.530722	1.4534	4.20209	15.1117	4.91383	5.05563	4.95069	7.76805	Level 2	-5.04	1.24188	0.0233084	ü
CHON	Aromatics	ESI-	(4-Ethenyl-3-nitrophenyl)methanol	C9H9NO3	178.05	11.417	[M-H]-1	0.0854621	0.322349	0.800607	0.235697	0.567174	0.363396	1.39338	0.0616264	0.439839	0.303061	0.171274	0.00553808	0.0154814	0.0430409	0.0831548	0.124774	0.187512	0.0183175	0.00547775	0.0437709	0.0224095	0.00572527	0.00656706	0.131224	0.540811	1.16632	0.709774	0.719278	0.866627	Level 2	-5.33	1.16022	0.0294192	ü
CHON	Aromatics	ESI-	1-(4-Methyl-3-nitrophenyl)ethan-1-one	C9H9NO3	178.05	12.317	[M-H]-1	0.552326	2.28269	2.35677	2.05718	2.98445	3.84147	2.01558	0.190866	1.00191	0.469026	0.234127	0	0	0.399817	0.260821	0.837365	1.18773	0.0824522	0.237507	0.43755	0.249576	0	0.044625	0.604851	3.02921	1.1202	0.982058	0.649189	2.34395	Level 2	-5.02	1.51693	0.025021	ü
CHO	Aromatics	ESI-	2-(Methoxycarbonyl)benzoic acid	C9H8O4	179.034	1.126	[M-H]-1	33.7906	43.1156	80.9189	64.1706	66.528	157.462	100.04	44.02	55.507	37.3072	31.5149	20.4916	4.29682	23.069	48.7038	39.5947	43.0427	27.2618	36.3805	56.803	59.6727	77.6454	47.354	34.5337	63.3416	85.4861	62.6332	45.2578	70.61	Level 2	-4.16
CHON	Aromatics	ESI-	2-Ethyl-3-methyl-4-nitrophenol	C9H11NO3	180.066	13.802	[M-H]-1	0.384949	1.00945	0.881854	1.08146	1.53288	2.28119	1.36917	0.326827	0.586977	0.575069	0.457105	0.0550543	0.0187087	0.468051	0.267436	0.714976	0.731675	0.113108	0.278112	0.425826	0.390745	0.1367	0.19613	0.573976	1.58227	0.534701	0.642656	0.56122	0.919168	Level 2	-4.98	1.22705	0.0281981	ü
CHON	Aromatics	ESI-	1-(2-Methyl-4-nitrophenyl)ethanol	C9H11NO3	180.066	13.125	[M-H]-1	2.96763	6.15574	6.96184	6.01708	7.88799	10.9195	8.82703	2.06049	3.99914	2.72315	1.87739	0.841728	0.663234	3.0145	2.12933	3.83806	4.42811	1.27315	2.42845	3.10935	2.88579	1.1594	2.36904	4.2985	10.1694	4.23089	4.39475	3.398	6.28996	Level 2	-4.93	1.20333	0.020666	ü
CHON	Aromatics	ESI-	1-(2-Methyl-5-nitrophenyl)ethanol	C9H11NO3	180.066	12.636	[M-H]-1	2.9888	7.7308	9.16185	7.55329	9.78917	9.59898	10.8582	2.39673	4.85548	2.63155	1.33549	0.717411	0.425108	3.22138	3.20394	4.17644	4.96573	1.24921	2.23827	3.80065	3.31929	1.99007	2.72029	4.89902	13.4033	8.28959	5.08645	3.86801	7.66799	Level 2	-4.84	1.54396	0.0309	ü
CHON	Aromatics	ESI-	1-(3-Methyl-2-nitrophenyl)ethanol	C9H11NO3	180.066	1.087	[M-H]-1	1.17059	1.474	1.51271	1.5938	1.58027	0.236842	2.09969	0.877636	0.871949	0.671636	0.844162	0.445009	0	1.48183	3.61265	1.39894	1.69411	0.857694	1.16161	1.47049	1.62428	2.20259	1.51263	1.39806	2.06098	3.6336	1.60251	1.54618	1.55411	Level 2	-4.03	1.14153	0.0362061	ü
CHO	Aromatics	ESI-	3-Hydroxy-2-(1-hydroxyethyl)benzoic acid	C9H10O4	181.05	1.127	[M-H]-1	2.58243	2.59909	8.24779	4.53105	3.56668	3.6968	6.08701	2.51871	3.96866	1.78938	1.68504	1.12641	0.736652	1.49772	3.33274	2.29304	2.87194	1.63378	2.10447	3.51604	2.96778	4.12255	2.72746	2.20391	5.25406	6.61818	4.67115	3.30539	5.61291	Level 2	-3.47
CHON	Aromatics	ESI-	2-Hydroxy-3-nitrobenzoic acid	C7H5NO5	182.009	4.506	[M-H]-1	0.0891525	2.19022	5.3786	4.9432	6.27489	12.2833	2.6351	1.27032	3.14698	2.80795	0.204515	0.0818988	0	0.0969406	0.41385	0.197102	0.540164	0.223692	0.435596	0.231843	0.887568	0.392693	0.095513	0.155373	2.33953	2.45062	0.423146	0.173701	4.70534	Level 1	-4.93	0.79155	-0.00833485
CHON	Aromatics	ESI-	3-Hydroxy-2-nitrobenzoic acid	C7H5NO5	182.009	1.216	[M-H]-1	1.01438	7.00079	10.8422	10.7218	12.742	11.1491	15.1983	6.08339	10.3244	9.34002	1.8005	1.20318	0	2.2733	3.95753	3.74598	4.17253	2.03012	2.70191	3.89854	5.49458	6.24539	1.11113	0.644373	6.0824	11.6936	3.57798	3.49315	11.9334	Level 2	-4.14	0.288863	0.00199852
CHON	Aromatics	ESI-	2-(1-Hydroxyethyl)-4-nitrophenol	C8H9NO4	182.045	10.347	[M-H]-1	11.6752	21.645	41.8065	25.6786	33.5812	39.1198	39.5113	6.65402	19.3718	6.43443	2.87741	0.572837	0.335228	2.20354	4.79644	8.12603	12.9569	1.81088	5.93792	10.0354	4.18807	1.852	3.82241	6.71399	36.5353	16.0642	11.8136	13.3118	30.9608	Level 2	-4.86	1.40602	0.0192465	ü
CHON	Aromatics	ESI-	3,4-Dimethyl-5-nitrocatechol	C8H9NO4	182.045	11.587	[M-H]-1	2.68292	4.90728	9.65847	5.8913	7.90828	14.9613	10.0643	1.99708	4.84353	1.03999	0.590467	0.0188977	0	0.298964	1.02081	1.61593	2.89914	0.350515	1.39576	2.13294	1.03598	0.675591	1.03227	1.49012	7.02799	3.39201	2.76836	2.72382	7.15973	Level 2	-4.84	1.31515	0.0152435	ü
CHON	Aromatics	ESI-	2,3-Dimethyl-5-nitrobenzene-1,4-diol	C8H9NO4	182.045	10.968	[M-H]-1	1.43576	2.37614	4.55997	3.53422	3.64468	4.7094	4.60887	0.81872	2.23882	0.607195	0.323866	0	0	0.365201	0.942065	1.69821	2.30329	0.301334	1.3233	2.0133	1.33616	0.419389	1.1954	1.56611	7.00564	2.64642	2.43427	2.44462	4.88732	Level 2	-4.83	1.49341	0.0297828	ü
CHON	Aromatics	ESI-	4,6-Dimethyl-2-nitrobenzene-1,3-diol	C8H9NO4	182.045	1.127	[M-H]-1	13.5203	18.7744	30.1667	21.5419	32.3346	1.73331	41.4723	11.1944	22.0871	9.28551	6.79272	1.76709	0	4.54204	21.9412	12.0825	16.3508	3.75776	9.54174	14.6608	7.31003	10.4996	6.88275	8.04543	32.0723	42.6351	15.5062	18.565	33.2674	Level 2	-3.93	1.72873	0.0505202	ü
CHON	Aromatics	ESI-	3,5-Dinitrophenol	C6H4N2O5	183.004	8.388	[M-H]-1	0	0.311222	1.65081	5.37766	2.23565	0.939622	0.804393	0.140218	0.625692	0.931809	0	0.054233	0.0396439	0.231993	0.0489688	0.527675	0.392388	0.549535	0.199901	0.389147	0.422407	0.0904306	0.0579288	0	0.821166	1.24229	0.634475	0.314435	0.407936	Level 2	-4.78	0.448521	0.00551134
CHO	Aromatics	ESI-	2,3,4-Trimethoxyphenol	C9H12O4	183.066	1.116	[M-H]-1	1.1195	1.12352	1.63426	1.31631	1.42457	2.13195	2.52421	1.12312	1.41566	1.20618	1.12862	0.943285	0.678272	0.860983	1.31341	1.06292	1.17604	0.92456	1.0727	1.31814	1.4773	1.52107	1.10993	0.951423	1.38472	1.64935	1.32013	1.2675	1.55236	Level 2	-4.09
CHO	Aromatics	ESI-	4,4'-Dihydroxybiphenyl	C12H10O2	185.06	11.624	[M-H]-1	0.89883	1.09679	2.02807	1.19791	1.38556	3.94814	1.72876	0.833713	1.11535	0.735069	0.635643	0.648541	0.617864	0.604124	0.644314	0.718286	0.878306	0.639191	0.72613	0.823868	0.950756	0.590926	0.683717	0.741494	1.13089	1.19013	1.00255	0.927909	1.47269	Level 3	-4.86
CHON	Aromatics	ESI-	4-Nitro-1-naphthol	C10H7NO3	188.034	13.027	[M-H]-1	3.38213	7.71192	6.27517	8.3708	11.2086	9.04622	9.19057	3.55759	4.22015	4.06721	2.43043	1.28636	1.38168	2.68938	1.94604	3.67628	5.22962	1.90477	2.97151	3.65351	3.3792	0.836462	1.09247	2.68955	11.2761	6.58413	4.04323	5.15451	8.55104	Level 2	-4.63	1.1118	0.0205935	ü
CHON	Aromatics	ESI-	α-Cyano-3-hydroxycinnamic acid	C10H7NO3	188.035	1.12	[M-H]-1	1.24675	1.5896	1.401	1.62484	1.88656	0.680524	2.58684	1.32777	1.17733	1.2772	1.19275	0.906213	0	1.13235	2.2633	1.33503	1.55139	1.15507	1.37499	1.3176	1.56309	1.50725	0.886394	0.970548	1.81941	3.00581	1.32468	1.69607	1.79477	Level 2	-3.52	1.11109	0.022564	ü
CHO	Aromatics	ESI-	3,4-Methylenedioxycinnamic acid	C10H8O4	191.034	12.435	[M-H]-1	35.0326	48.1237	91.3898	62.7732	68.6373	247.688	93.0591	38.9139	48.5191	40.6728	32.1294	16.8027	5.08522	1.70115	2.2576	2.13913	3.77021	0.229764	2.48069	4.31965	7.74926	1.82827	2.76268	1.54044	5.26534	83.9303	49.3056	41.9472	78.9809	Level 2	-4.84
CHON	Aromatics	ESI-	1-(2-Ethenyl-4-nitrophenyl)ethan-1-ol	C10H11NO3	192.066	13.351	[M-H]-1	0.848263	2.2194	2.46624	1.97764	3.2492	4.16572	2.93223	0.502078	1.0331	0.744027	0.441273	0.106759	0.0903352	0.799513	0.524439	1.23319	1.5636	0.119288	0.477289	0.83945	0.465955	0.163502	0.4275	1.22241	3.64547	1.47007	1.36068	0.928122	2.59636	Level 2	-4.31	1.47666	0.0265954	ü
CHON	Aromatics	ESI-	2-Methallyl-6-nitrophenol	C10H11NO3	192.066	1.148	[M-H]-1	0.253468	0.306459	0.408711	0.449196	0.422458	0.180372	0.467198	0.246809	0.287628	0.226628	0.261778	0.0786899	0	0.312862	0.79143	0.325291	0.355728	0.151214	0.224726	0.356761	0.505373	0.590566	0.345581	0.358868	0.462963	0.761453	0.432605	0.420128	0.468136	Level 2	-4.3	1.05581	0.032993	ü
CHO	Aromatics	ESI-	2-(Ethoxycarbonyl)benzoic acid	C10H10O4	193.05	1.113	[M-H]-1	2.11163	2.63201	4.86915	3.41975	3.1317	12.1388	4.67515	2.10099	2.62702	1.81861	1.8172	1.26192	0.748913	1.43397	2.49578	2.01385	2.26884	1.6077	1.89887	2.47242	2.93682	3.37358	1.93061	1.75845	2.77324	4.12015	2.87624	2.39057	3.70388	Level 2	-3.74
CHON	Aromatics	ESI-	3-(4-Nitrophenyl)propanoic aicd	C9H9NO4	194.045	10.703	[M-H]-1	46.9752	65.4587	169.808	95.0559	148.816	235.768	274.9	16.2324	125.112	68.6071	29.2552	0.993771	2.07686	3.58464	26.0878	38.2322	40.5385	6.97032	5.15045	13.9558	5.14413	3.62721	2.38776	4.54651	67.5187	69.5966	55.2713	64.6147	114.647	Level 3	-4.54	0.949119	0.018101
CHON	Aromatics	ESI-	3,5-Diethyl-4-nitrophenol	C10H13NO3	194.081	14.165	[M-H]-1	0.600264	1.37621	1.54427	1.24655	2.28009	2.65952	2.04864	0.478038	0.925128	0.810433	0.658018	0.236465	0.177889	1.03909	0.466739	1.07201	1.16351	0.217941	0.66686	0.751496	0.578602	0.264936	0.712224	1.22468	2.57347	0.915619	1.22607	0.913316	1.67519	Level 2	-4.67	0.842495	0.0136231
CHON	Aromatics	ESI-	3,6-Diethyl-4-nitrophenol	C10H13NO3	194.081	13.715	[M-H]-1	0.759429	1.87477	2.27631	1.93999	2.39645	3.0389	2.5381	0.410574	0.881474	0.629986	0.388886	0.172894	0.153049	0.89172	0.625517	0.930373	1.23192	0.170943	0.59121	1.0059	0.593867	0.285007	0.648476	1.3913	3.37822	2.52733	1.57669	1.14834	2.26854	Level 2	-4.51	1.47376	0.0283557	ü
CHON	Aromatics	ESI-	2-(1-Hydroxyethyl)-3-methyl-5-nitrophenol	C9H11NO4	196.061	12.83	[M-H]-1	0.424647	0.928844	1.6565	1.13743	1.84105	1.89301	2.07928	0.307545	0.937884	0.198174	0.0553287	0.0110802	0	0.0485321	0.186733	0.369401	0.601924	0.0433611	0.344083	0.548221	0.221715	0.0678037	0.238956	0.36364	1.95451	0.142753	0.158411	0.114481	0.407244	Level 2	-4.77	1.06743	0.0121573	ü
CHON	Aromatics	ESI-	2-(1-Hydroxyethyl)-3-methyl-4-nitrophenol	C9H11NO4	196.061	11.776	[M-H]-1	2.69124	4.4548	9.676	6.28933	9.51835	3.3998	9.40366	1.40185	4.51379	1.29287	0.674389	0.0621603	0.0152157	0.391518	0.9221	1.9761	2.92902	0.303598	1.27595	2.2079	0.739596	0.284563	0.908155	1.40114	8.32251	3.62903	2.94671	3.46635	9.60012	Level 2	-4.47	1.36656	0.0171263	ü
CHON	Aromatics	ESI-	2-Ethyl-3-(hydroxymethyl)-5-nitrophenol	C9H11NO4	196.061	13.046	[M-H]-1	0.250891	0.347671	0.633199	0.40955	0.811953	2.34458	0.872821	0.20089	0.343665	0.108553	0.0727846	0.0107819	0	0.0145607	0.11992	0.127154	0.306873	0.0102999	0.130132	0.223939	0.0693991	0.0347887	0.077235	0.165613	0.778825	0.454621	0.45188	0.462397	1.30926	Level 2	-4.4	1.19711	0.0156979	ü
CHON	Aromatics	ESI-	3-(1-Hydroxyethyl)-2-methyl-4-nitrophenol	C9H11NO4	196.061	10.615	[M-H]-1	0.11734	0.721151	2.37985	1.03522	1.61053	8.97369	1.75609	0.0882863	0.719239	0.0786179	0	0	0.0161079	0.0139969	0.0651685	0.106911	0.312161	0.0156332	0.111794	0.270767	0.0830698	0.0156534	0.0715788	0.0800543	1.40779	0.771708	0.273025	0.32266	1.29291	Level 2	-3.71	1.28539	0.0164343	ü
CHON	Aromatics	ESI-	4-Ethyl-3-(hydroxymethyl)-2-nitrophenol	C9H11NO4	196.061	1.114	[M-H]-1	2.04486	2.73939	4.8458	3.36803	5.33103	0.290777	6.52375	1.61571	3.27926	1.60114	1.27822	0.345642	0	0.706418	3.49458	1.87084	2.26015	0.613258	1.46188	2.17209	1.11522	1.75382	1.09258	1.09327	4.18798	6.01088	2.16134	2.66135	5.22573	Level 2	-3.25	1.66093	0.049842	ü
CHON	Aromatics	ESI-	2-Methyl-4,6-dinitrophenol	C7H6N2O5	197.019	11.381	[M-H]-1	0.0140638	0.874151	1.63185	5.78232	3.15291	0.569662	1.46125	0.368522	1.44019	5.56868	1.20037	0.292114	0	0.346526	0.0684757	2.66469	1.08503	1.61174	0.129832	0.936283	0.892716	0.0223842	0	0	1.09346	0.456276	0.335431	0.142871	0.201144	Level 2	-4.56	0.1389	1.80887e-05
CHON	Aromatics	ESI-	3,5-Dinitro-o-cresol	C7H6N2O5	197.019	11.589	[M-H]-1	0.00716396	0.472123	1.21197	2.67926	1.52367	4.25918	1.55558	0.340423	0.736624	0.892519	0.11552	0.549873	0.728859	0.345807	0.258169	1.41738	0.676405	0.865877	0.421779	1.0217	1.13426	0.354681	0.133476	0.171771	0.896946	0.813659	1.06706	1.18818	0.960651	Level 2	-4.53	0.382998	0.0128635
CHON	Aromatics	ESI-	2,6-Dinitro-p-cresol	C7H6N2O5	197.02	1.111	[M-H]-1	0	0.569188	0.689516	2.16582	1.62495	0	0.792604	0.388847	0.850257	4.16525	1.18376	0.197204	0	0.230546	0.757959	1.59185	0.666987	1.12461	0.253381	0.579538	0.582462	0.531629	0	0.0236142	0.60772	1.14441	0.477454	0.660831	0.387434	Level 2	-3.68	0.363561	0.00431347
CHO	Aromatics	ESI-	4-Hydroxybenzophenone	C13H10O2	197.06	14.01	[M-H]-1	1.58755	3.43308	6.05108	1.49971	2.51459	20.1283	0.792649	0	0.120982	0	0	0	0	0	0.126093	0.00234713	1.596	0	0.124172	0.935967	0.446121	0	0.64401	2.23939	3.46466	2.31095	1.83346	0.660799	4.58371	Level 3	-4.8
CHO	Aromatics	ESI-	Bis(4-hydroxyphenyl)methane	C13H12O2	199.076	13.057	[M-H]-1	0.863086	0.994466	1.85373	1.0222	1.09384	2.90622	1.4832	0.682762	0.797932	0.698192	0.642223	0.636164	0.595503	0.588796	0.608964	0.67801	1.16009	0.620167	0.649204	0.813987	0.837231	0.58636	0.660248	0.777326	1.13079	0.980953	0.916296	0.752559	1.26816	Level 2	-4.77
CHON	Aromatics	ESI-	Indole-3-pyruvic acid	C11H9NO3	202.05	13.644	[M-H]-1	0.124157	0.179021	0.121003	0.14843	0.206027	0.177011	0.245891	0.120039	0.103889	0.148679	0.119984	0.0973302	0.0966074	0.109693	0.100205	0.127273	0.148132	0.109189	0.128807	0.11987	0.138761	0.0859998	0.0934101	0.124485	0.205859	0.256155	0.255894	0.285288	0.473255	Level 2	-4.27	0.116612	-0.00223983
CHON	Aromatics	ESI-	4-Methyl-6-nitronaphthalen-1-ol	C11H9NO3	202.05	13.099	[M-H]-1	1.44126	3.10533	2.53828	2.50488	4.22194	2.67596	2.97526	0.936467	1.0101	1.23023	0.595371	0.258371	0.251917	0.76207	0.610483	1.37759	1.94152	0.432233	0.904424	1.17931	0.942866	0.167621	0.539133	1.1585	4.45422	2.0237	0.695173	0.872793	1.90199	Level 2	-4.21	1.15904	0.0208395	ü
CHON	Aromatics	ESI-	2-Methyl-4-(4-nitrophenyl)but-3-en-1-ol	C11H13NO3	206.081	14.194	[M-H]-1	0.184435	0.749022	0.784111	0.541545	1.19312	1.24863	0.903424	0.0749986	0.247049	0.189352	0.108075	0.0877266	0.0422868	0.309479	0.144118	0.4095	0.576124	0.0170027	0.170178	0.355047	0.147597	0.0500342	0.104677	0.430153	1.54638	0.873925	0.626327	0.548524	1.18542	Level 2	-4.11	1.45337	0.0285389	ü
CHO	Aromatics	ESI-	2-[3-Hydroxy-2-(2-oxoacetyl)phenyl]acetic acid	C10H8O5	207.029	1.189	[M-H]-1	4.70192	7.39213	13.4339	13.14	19.6666	35.1232	29.3163	11.0413	14.4137	15.1221	11.6022	5.00257	0.89558	2.58428	6.72282	5.26729	7.96114	6.26687	4.49078	11.4894	13.984	17.7333	3.17354	1.53211	9.38224	16.4022	10.2716	7.75584	18.5287	Level 2	-3.43
CHON	Aromatics	ESI-	2-Ethyl-4,6-dimethyl-5-nitrobenzene-1,3-diol	C10H13NO4	210.076	12.887	[M-H]-1	0.38547	0.822271	2.335	1.37837	2.50639	3.00464	2.42484	0.125204	0.86559	0.218687	0.106555	0.0155824	0.0273654	0.0272898	0.0605972	0.269598	0.39617	0.029858	0.213617	0.433365	0.144218	0.0259385	0.0896346	0.183335	1.80304	1.49472	0.785271	1.04951	3.2377	Level 2	-4.12	1.26507	0.0169574	ü
CHO	Aromatics	ESI-	4-(4-Methylphenyl)benzoic acid	C14H12O2	211.076	15.01	[M-H]-1	14.2295	25.5601	36.6407	11.7213	20.2427	64.302	8.57374	1.33047	2.77401	2.56882	1.01858	0.288314	1.0056	2.87948	2.51011	4.90922	15.7582	0.656607	2.22453	13.0192	3.87507	1.68611	11.213	25.0258	33.9319	15.1822	23.3601	11.5283	39.4943	Level 3	-3.8
CHO	Aromatics	ESI-	3-Hydroxy-1,8-naphthalic anhydride	C12H6O4	213.019	10.638	[M-H]-1	0.540386	0.643452	0.753136	0.893584	0.738598	1.71159	1.33056	0.60184	0.65559	0.59861	0.556951	0.550483	0	0.523616	0.546769	0.581982	0.556667	0.532845	0.550567	0.541527	0.711675	0.557824	0.523977	0.513022	0.639098	1.0312	0.617591	0.553095	0.779227	Level 2	-3.5
CHON	Aromatics	ESI-	1-Nitro-2-phenoxybenzene	C12H9NO3	214.05	12.516	[M-H]-1	0.0393834	0.349551	0.306448	0.408568	1.08663	0.90638	0.31215	0.137788	0.159537	0.621068	0.32737	0.00553291	0	0.0113681	0.0131123	0.189552	0.228767	0.078315	0.0374884	0.0192574	0.068098	0	0	0.0205839	0.364421	0.35197	0.242845	0.365683	0.587021	Level 2	-3.87	0.459417	0.00904428
CHON	Aromatics	ESI-	3-Nitro-4-biphenylol	C12H9NO3	214.05	13.891	[M-H]-1	0.0888535	0.527211	0.456038	0.599273	1.33396	1.99093	0.823515	0.166427	0.237438	0.949457	0.481757	0.031578	0.0306781	0.308348	0.0909445	0.441845	0.324987	0.152872	0.119476	0.212269	0.146829	0.0409252	0.0304969	0.143266	0.708237	0.155491	0.250813	0.350862	0.569676	Level 2	-3.6	0.373297	0.0107317
CHON	Aromatics	ESI-	4-Hydroxy-5,8-dimethylquinoline-3-carboxylic acid	C12H11NO3	216.066	14.618	[M-H]-1	0.417495	1.01235	0.55147	0.701992	1.24037	0.448626	0.483605	0.162475	0.0508537	0.449342	0.0837753	0.0311648	0	0.166042	0.0811551	0.279059	0.572586	0.0588148	0.202064	0.365784	0.114729	0	0.191446	0.389248	1.31929	0.840612	0.523987	0.618694	1.48429	Level 3	-4.13	1.14112	0.0133267	ü
CHO	Aromatics	ESI-	Bisphenol A	C15H16O2	227.107	13.691	[M-H]-1	0.590137	0.843362	2.21427	0.692803	0.856821	5.02857	0.554045	0.0803789	0.202273	0.114586	0.0614826	0.00529221	0.0440713	0.083668	0.180356	0.212482	0.735501	0.0193318	0.111809	0.424893	0.135689	0.0456018	0.440429	1.04871	1.49828	0.754323	0.902321	0.498653	1.71215	Level 2	-4.14
CHON	Aromatics	ESI-	2-Nitrooxanthrene	C12H7NO4	228.029	14.413	[M-H]-1	0.832554	4.15614	0.0541868	2.68164	4.81345	1.06102	0.662073	1.45942	0.212126	13.0249	4.87273	3.63226	3.51559	1.69951	0.0541579	3.54169	6.29395	7.35486	0.98085	1.3718	0.0673504	0.0527703	0.0521665	1.22752	5.02183	0.742913	2.26908	4.53496	2.45963	Level 3	-3.49	0.610323	-0.0133598
CHON	Aromatics	ESI-	1-Nitrooxanthrene	C12H7NO4	228.03	13.965	[M-H]-1	0.566129	8.55034	0.519563	3.39288	6.42986	0	0.937042	1.88697	0.233502	15.4824	4.14673	1.53651	1.38344	0.447593	0.225234	1.70873	4.01076	5.84561	0.901558	0.437002	0.0673504	0.0527703	0.0521665	0.370366	2.91558	1.82396	1.86339	2.2995	1.27702	Level 3	-3.11	0.438075	-0.0112056
CHO	Aromatics	ESI-	Methyl 2-(1-hydroxyethyl)-3,6-dimethoxybenzoate	C12H16O5	239.092	1.117	[M-H]-1	0.970644	1.0187	1.14925	1.09785	1.13271	1.6459	2.10807	1.0002	1.11236	1.03029	1.08448	0.890771	0.653504	0.844735	1.06081	1.00559	1.02802	0.870854	0.865953	1.08552	1.33377	1.18414	0.938142	0.93466	1.20299	1.2613	1.16523	1.09218	1.19687	Level 2	-3.86
CHO	Aromatics	ESI-	5-[2-(3,4-Dihydroxyphenyl)ethenyl]benzene-1,3-diol	C14H12O4	243.066	1.035	[M-H]-1	0.883196	0.918665	1.16661	1.03845	1.03424	6.44445	1.81469	0.866119	0.96601	0.840788	0.846438	0.713688	0.632149	0.730144	1.01004	0.946789	0.930741	0.749662	0.813928	0.974766	1.1748	1.2173	0.888434	0.798454	1.13249	1.54699	1.22337	1.07159	1.63718	Level 2	-2.61
CHOS	Alicyclics	ESI-	4-Decyl-1,3,2-dioxathiolane 2,2-dioxide	C12H24O4S	263.132	16.747	[M-H]-1	2.08655	3.16286	7.16792	4.71141	4.74391	3.2879	4.83779	1.52218	2.07277	0.853276	1.59509	1.38845	0.357745	1.45217	1.47911	1.27062	1.8032	0.69909	1.43185	1.60666	2.14442	3.44871	1.67794	0.95432	1.87314	2.73856	1.50517	1.60082	3.42328	Level 2	-2.94
CHOS	Aliphatics	ESI-	10-(Sulfooxy)dec-6-enoic acid	C10H18O6S	265.075	1.257	[M-H]-1	1.08009	1.3802	2.42667	2.93041	5.56104	10.2613	6.25202	3.59772	3.11809	4.30996	4.05134	2.35177	2.5768	1.56289	0.986171	1.80959	1.88407	1.62722	2.25505	2.7254	3.5888	2.32954	0.98742	0.625852	1.69637	2.94313	1.73326	2.24109	5.67322	Level 2	-2.71
CHO	Aromatics	ESI-	Dipropyl-3-hydroxybenzene-1,2-dicarboxylate	C14H18O5	265.108	1.108	[M-H]-1	2.64984	2.8779	6.36975	3.58134	3.981	21.9286	5.52952	2.37142	3.06635	2.23357	2.55192	1.263	1.43395	1.4937	3.09016	2.50305	2.64044	1.90811	2.11707	2.9662	3.51358	3.84668	2.5716	2.35441	3.55918	5.06407	3.84187	3.49484	5.364	Level 2	-2.39
CHOS	Aliphatics	ESI-	{2-[(2E)-non-2-en-1-yloxy]ethoxy}sulfonic acid	C11H22O5S	265.111	9.239	[M-H]-1	12.2686	15.4549	14.931	21.3985	18.1441	63.8092	27.7125	16.7087	16.6354	21.8888	16.9446	9.65992	11.6288	11.8425	8.02281	8.22216	10.4599	8.95232	14.6702	9.42011	22.4224	13.4227	5.98226	4.58276	10.9685	20.7825	15.1357	13.4082	24.0451	Level 2	-3.62
CHOS	Aliphatics	ESI-	10-(Sulfooxy)decanoic acid	C10H20O6S	267.09	1.272	[M-H]-1	1.85337	3.42702	6.86728	6.19972	7.84552	56.8624	14.4179	4.64761	4.92642	2.54724	3.47315	4.654	7.89987	3.48417	1.6227	2.01398	3.39877	1.29767	4.2377	3.80933	6.41671	7.96263	1.32465	0.648929	3.49389	6.98469	3.21567	2.30856	12.3123	Level 2	-2.7
CHOS	Aliphatics	ESI-	11-Hydroxyundecyl hydrogen sulfate	C11H24O5S	267.127	13.973	[M-H]-1	3.98452	6.032	10.0892	9.71857	6.01463	54.501	19.4074	5.14454	4.9263	0.279816	1.61662	3.11537	3.95787	15.3114	3.32497	2.84528	2.93313	0.465905	4.18284	5.39151	12.9208	14.5592	9.64694	6.95919	6.625	9.25735	5.57126	2.99934	17.0372	Level 2	-2.07
CHOS	Aliphatics	ESI-	[(4-Hydroxyundecyl)oxy]sulfonic acid	C11H24O5S	267.127	14.177	[M-H]-1	2.29162	4.13632	8.41323	6.12861	5.31241	44.7234	12.5969	3.26545	4.82438	0.699265	2.07672	0.924752	1.39603	1.94563	3.27757	3.07873	3.70613	0.570793	4.60776	5.81266	14.6139	21.8553	5.38093	2.70612	6.97818	13.3177	5.8606	3.27981	13.3524	Level 2	-1.7
CHOS	Aromatics	ESI-	{2-[3-(Acetyloxy)prop-1-en-1-yl]phenyl}sulfate	C11H12O6S	271.028	1.251	[M-H]-1	2.14594	5.42296	6.48167	5.50665	5.31132	12.0856	5.343	2.73872	2.46852	1.3243	1.36032	1.6701	1.69131	2.13077	1.8325	2.24929	4.09912	2.05649	2.95893	4.19944	9.72561	4.29943	4.20059	4.12044	5.88339	9.97507	4.29159	3.01267	6.5605	Level 2	-1.11
CHO	Aromatics	ESI-	1-(4-Hydroxy-3-methoxyphenyl)dec-3-en-5-one	C17H24O3	275.165	13.506	[M-H]-1	0.753106	1.2049	2.09352	1.93571	2.23281	5.59577	2.62445	0.959271	1.44816	1.3555	1.50734	0.713804	0.945803	0.704075	0.707392	1.36673	0.956796	0.830191	0.819257	1.46828	1.35909	0.749063	0.741533	0.782847	2.9141	1.37103	1.06115	1.5083	1.63855	Level 3	-2.34
CHOS	Alicyclics	ESI-	4-Undecyl-1,3,2-dioxathiolane-2,2-dione	C13H26O4S	277.147	16.196	[M-H]-1	3.19064	5.52488	9.36155	6.50371	6.67351	9.91627	7.42024	3.26262	3.80289	2.72737	3.61574	3.41155	1.35094	2.70788	2.73256	2.99161	3.79714	2.47905	3.3308	3.91523	4.14772	5.1554	2.91035	1.78876	5.69994	6.30558	3.0689	2.82976	6.61505	Level 2	-4.33
CHOS	Aliphatics	ESI-	(4E)-6-Oxo-2-[(sulfooxy)methyl]-oct-4-enoic acid	C10H16O7S	279.054	1.24	[M-H]-1	1.07469	1.44377	2.66708	2.56188	3.82727	0.930511	4.9459	2.68283	2.766	5.01636	5.34385	4.65486	5.72909	3.57496	3.05313	2.35748	6.39349	2.68036	4.59428	9.89035	6.80105	3.01017	1.79147	1.57152	3.43499	2.89565	2.95477	4.90837	4.82847	Level 2	-1.13
CHOS	Aliphatics	ESI-	[(12-Hydroxydodec-4-en-1-yl)oxy]sulfonic acid	C12H24O5S	279.127	13.053	[M-H]-1	10.7139	15.6851	23.1801	26.4306	26.3834	94.3759	35.7094	18.8466	21.7782	25.6604	24.2273	9.76025	14.6128	7.52781	8.64785	9.50604	11.9177	8.68197	13.5685	10.7418	21.238	18.3932	6.21418	4.14641	11.7484	20.7359	12.2	12.8471	26.3276	Level 2	-1.37
CHOS	Aliphatics	ESI-	Tridecyl hydrogen sulfate	C13H28O4S	279.163	17.394	[M-H]-1	10.5206	9.12685	22.3259	13.8531	13.4652	43.1655	20.6189	9.92799	13.3185	7.18429	9.80163	9.61794	10.4489	8.84479	9.10056	8.41153	23.1763	5.26918	10.0017	10.1325	13.4267	16.7099	8.92646	6.95868	10.8266	14.781	9.99441	10.0411	17.0697	Level 2	-2.26
CHOS	Alicyclics	ESI-	(2,2-Dimethyl-1,3-dioxolan-4-yl)methyl 2,2-dimethylpropyl sulfate	C11H22O6S	281.106	1.27	[M-H]-1	3.57475	5.83226	12.222	10.8274	12.9688	65.6019	19.2351	5.89057	7.14267	1.64685	2.83796	3.79731	4.16328	1.44289	1.70797	2.09751	2.28008	0.782979	3.25893	3.65773	8.18979	9.61456	1.72335	0.879951	3.60318	8.42474	3.22052	2.37991	14.2333	Level 2	-0.76
CHOS	Aliphatics	ESI-	12-Hydroxydodecyl hydrogen sulfate	C12H26O5S	281.142	14.897	[M-H]-1	2.34004	4.81682	7.93433	6.78064	6.20916	31.1956	11.3078	4.00562	4.69814	1.00728	2.1372	1.3546	1.48034	1.67542	2.61902	3.32163	4.15926	0.7911	4.21954	4.83247	12.7121	16.3827	3.92972	2.24226	5.93111	6.11432	2.72084	1.46075	6.04047	Level 2	-2.12
CHOS	Aliphatics	ESI-	5-Hydroxydodecyl hydrogen sulfate	C12H26O5S	281.142	15.172	[M-H]-1	0.433092	0.795604	1.36204	1.14253	0.949598	8.10929	1.97956	0.77489	0.798212	0.332948	0.482693	0.413087	0.602956	0.487585	0.443879	0.624219	0.733407	0.334655	0.817894	0.827229	2.08926	1.55575	0.789905	0.477349	1.11255	6.43313	3.19374	2.08953	7.36795	Level 2	-1.94
CHOS	Aliphatics	ESI-	11-Hydroxydodecyl hydrogen sulfate	C12H26O5S	281.143	12.832	[M-H]-1	12.0972	13.5992	16.0561	16.4365	10.6951	80.7916	36.0948	9.97046	9.01244	0.815479	2.84315	5.48539	8.26061	21.8388	8.32003	6.09038	9.05804	1.26675	10.3616	14.0152	14.2992	13.3057	19.802	18.472	9.52997	17.1717	13.2446	5.63354	17.5681	Level 2	-0.93
CHOS	Aliphatics	ESI-	2-(Decyloxy)ethyl hydrogen sulfate	C12H26O5S	281.143	14.006	[M-H]-1	0.481379	0.818642	2.22282	1.45453	1.28888	14.1506	3.78324	1.22446	1.72367	0.365524	0.771988	0.41213	0.396781	0.786585	1.92422	1.30153	1.47757	0.266061	1.52092	1.67774	4.11831	5.1282	1.90906	0.888299	2.45862	4.28387	1.96615	1.31668	3.50964	Level 3	-1.01
CHOS	Aliphatics	ESI-	6-Hydroxy-10-(sulfooxy)decanoic acid	C10H20O7S	283.085	1.261	[M-H]-1	1.72785	2.59796	4.0048	3.25973	3.13679	7.76077	3.07691	1.40516	1.42382	1.47057	1.57512	1.48164	1.57957	0.633069	0.592212	0.888637	1.11136	0.809321	1.0897	1.39053	2.16727	1.4319	0.497145	0.360779	1.05096	1.9091	1.17894	0.975793	2.82048	Level 2	-2.6
CHOS	Aromatics	ESI-	2-{6-methyl-2-[(1E)-prop-1-en-1-yl]-3-(sulfooxy)phenyl}acetic acid	C12H14O6S	285.044	1.269	[M-H]-1	1.25788	3.22488	4.77921	4.3572	4.64504	8.7879	3.16985	1.49631	1.34567	0.710016	0.757725	0.918338	0.946027	1.29377	0.780069	1.21712	1.92617	1.0101	1.57629	2.20193	5.76436	2.76287	2.47192	2.26794	3.4197	4.08597	3.30712	2.26744	4.91656	Level 2	-1.08
CHO	Aliphatics	ESI-	1,16-Hexadecanedioic acid	C16H30O4	285.206	16.771	[M-H]-1	2.22526	4.98938	7.80492	7.02532	10.0331	48.0389	8.45197	9.0465	4.35932	18.5619	5.01876	8.29526	20.9196	2.75843	2.7362	7.66829	7.36497	4.65395	3.72894	9.58746	7.28111	5.21787	2.06868	2.05417	13.3017	13.5192	4.77076	5.23854	9.08184	Level 2	-2.45
CHOS	Aromatics	ESI-	4-Hydroxy-5-[3-(sulfooxy)phenyl]pentanoic acid	C11H14O7S	289.038	1.248	[M-H]-1	0.93278	2.47222	3.54596	1.90294	2.42241	3.97956	2.47107	1.11493	1.23879	0.885899	1.08136	1.02062	0.841199	1.48677	1.22876	1.35535	2.01812	1.24928	1.67789	2.34503	5.89404	2.03752	1.76842	2.33598	3.76404	5.83306	2.75589	1.96755	3.66507	Level 2	-2.41
CHOS	Aliphatics	ESI-	4-[(2E)-Dodec-2-en-1-yl]-1,3,2-dioxathiolane-2,2-dione	C14H26O4S	289.147	15.545	[M-H]-1	1.15759	2.92136	5.59133	4.55862	4.65238	7.17659	3.92659	1.32436	1.6275	1.05358	1.43545	1.63116	1.54071	0.795683	1.0157	0.896258	1.71124	0.450709	1.85391	1.60077	1.77485	2.46222	1.27645	0.866219	2.10693	3.95974	2.43159	2.08414	4.74969	Level 2	-2.11
CHOS	Aliphatics	ESI-	{[2-(Penta-1,3-dien-1-yloxy)octyl]oxy}sulfonic acid	C13H24O5S	291.126	12.322	[M-H]-1	3.10702	5.11854	9.6801	7.96892	8.06994	28.4329	9.94267	3.50911	4.71153	3.07735	3.21939	0.993219	0.75047	0.945519	1.46035	1.78724	2.14611	0.728794	2.20669	2.54325	4.15711	5.09785	1.43539	1.22192	4.10278	6.94055	4.36601	3.28832	8.97338	Level 3	-3.89
CHOS	Aliphatics	ESI-	4,9-Dioxo-10-(sulfooxy)dec-6-enoic acid	C10H14O8S	293.033	1.245	[M-H]-1	0.55567	0.60857	1.0249	0.883553	1.23653	1.28745	2.05832	0.756387	0.820316	0.872137	0.86987	0.872399	0.850453	0.624182	0.587684	0.672058	1.09102	0.756924	0.857706	1.36366	2.1348	1.09539	0.834997	0.671132	1.14078	1.28844	0.947396	1.01761	1.47855	Level 2	-1.66
CHOS	Aliphatics	ESI-	Myristyl sulfate	C14H30O4S	293.179	17.017	[M-H]-1	34.0119	34.3998	17.9575	40.2287	27.424	73.705	22.7673	21.2644	0	12.6625	0	63.5931	78.8453	6.64699	38.3969	3.50365	50.9842	15.7374	41.3865	53.1753	10.7262	26.4474	37.2607	47.2187	64.4931	37.4091	23.1454	9.58478	50.8465	Level 2	-1.75
CHONS	Aromatics	ESI-	[3-(methoxycarbonyl)-2,7-dimethyl-1H-indol-5-yl]oxidanesulfonic acid	C12H13NO6S	298.039	1.23	[M-H]-1	5.13286	9.86238	9.2244	8.57394	8.20243	13.9255	9.71655	3.70107	4.06906	8.04369	4.32031	3.14616	6.36019	25.4862	3.86814	10.0985	12.2961	6.49507	10.0796	15.8435	33.0144	9.48464	35.3828	29.3797	20.3299	28.2467	16.5478	9.65425	10.8195	Level 3	-0.93
CHOS	Aromatics	ESI-	2-(1-Hydroxybut-2-en-1-yl)-5-sulfooxy-phenylacetic acid	C12H14O7S	301.038	1.244	[M-H]-1	1.41967	2.92647	4.70859	3.6359	3.91328	24.5314	5.80889	2.31233	2.32338	1.08679	1.40822	1.3101	1.2123	1.47861	1.38472	1.83025	2.81911	1.36975	2.14269	2.99615	8.47905	6.00929	2.57478	2.09967	3.87354	6.59113	3.02825	2.07478	6.42713	Level 2	-1.41
CHOS	Aromatics	ESI-	4-Hydroxy-5-[4-hydroxy-3-(sulfooxy)phenyl]pentanoic acid	C11H14O8S	305.032	1.238	[M-H]-1	0.184361	0.184201	0.824737	0.598735	0.715482	2.02984	1.009	0.236438	0.432886	0.414623	0.260663	0.198115	0.186621	0.181142	0.183722	0.186537	0.247515	0.191767	0.188415	0.517393	1.21288	0.467738	0.176966	0.293324	0.51178	0.903095	0.572563	0.188635	0.888418	Level 2	-2.67
CHOS	Aliphatics	ESI-	{[10-(2-Hydroxyethoxy)-10-oxodeca-2,4-dien-1-yl]oxy}sulfonic aicd	C12H20O7S	307.085	1.259	[M-H]-1	2.93596	3.95246	8.94249	7.04242	7.71092	17.9537	6.35139	2.35869	3.13494	1.86488	2.05651	1.58963	1.02234	0.782339	0.779597	1.4616	1.54464	0.967651	1.2548	2.30872	3.14127	4.22268	0.821399	0.934174	2.52004	6.50555	5.20279	3.5311	8.4601	Level 2	-2.9
CHOS	Aliphatics	ESI-	Pentadecyl hydrogen sulfate	C15H32O4S	307.194	18.002	[M-H]-1	3.76656	6.22626	8.53509	10.0717	11.2638	33.9177	14.0299	4.8464	5.16116	2.66487	4.85855	4.3847	3.30581	3.20771	3.11281	3.89403	4.25042	1.34171	5.01246	5.6516	9.35348	13.0176	5.25105	3.57147	6.22344	10.472	6.0438	5.47603	12.0194	Level 2	-2.67
CHOS	Aliphatics	ESI-	11-Hydroxytetradecyl hydrogen sulfate	C14H30O5S	309.173	14.904	[M-H]-1	10.0732	31.592	27.6508	36.7949	26.2232	132.694	46.6595	29.4419	10.2644	7.99878	1.6355	49.8754	63.578	4.93676	31.0025	6.67741	47.4172	10.0394	38.3672	31.5479	30.9235	39.3787	30.7057	33.482	55.3646	47.5462	22.4067	9.11131	60.9025	Level 2	-2.25
CHO	Alicyclics	ESI-	1,5,6-Trimethyl-5-(3-methylidenepent-4-en-1-yl)-3-oxo-1,2,3,5,6,7,8,8a-octahydronaphthalene-1-carboxylic acid	C20H28O3	315.196	15.445	[M-H]-1	0.892151	2.18736	2.32466	3.15055	2.88466	5.05554	2.97621	1.63885	1.40538	2.22309	1.91001	0.822697	1.28914	1.18004	1.87683	4.58568	2.60441	2.34212	1.52155	2.8843	2.69862	0.754576	0.953103	1.54794	6.38865	2.73457	1.78916	2.97354	1.92699	Level 2	-3.35
CHO	Aromatics	ESI-	7-(1-Hydroxypropan-2-yl)-1,4a-dimethyl-1,2,3,4,4a,9,10,10a-octahydrophenanthrene-1-carboxylic acid	C20H28O3	315.196	16.488	[M-H]-1	1.48035	2.98195	3.22213	4.57432	4.07487	3.62101	4.59648	2.70031	2.26745	3.51841	3.2632	1.0974	1.11225	0.865219	0.960547	2.20541	1.40686	1.46941	1.02757	3.26517	3.74034	1.09786	1.47525	2.12196	7.6198	2.99436	2.20936	3.35213	2.75906	Level 2	-3.33
CHO	Aromatics	ESI-	9-Hydroxy-1,4a-dimethyl-7-(propan-2-yl)-1,2,3,4,4a,9,10,10a-octahydrophenanthrene-1-carboxylic acid	C20H28O3	315.196	17.044	[M-H]-1	0.609211	1.82197	1.77266	2.79359	2.85848	13.3453	2.60477	1.65853	1.13459	1.96888	2.28831	0.618255	2.30349	0.575792	0.577307	2.41505	1.17577	1.25217	0.888869	2.03367	2.18729	0.47088	0.591897	0.71259	4.62041	1.28816	1.28054	2.1308	1.39996	Level 2	-3.21
CHOS	Aliphatics	ESI-	{2-[(2E)-Tridec-2-en-1-yloxy]ethoxy}sulfonic acid	C15H30O5S	321.173	15.337	[M-H]-1	5.73286	11.0532	18.7912	19.1312	21.9075	83.3924	28.6318	11.7259	13.2663	10.6456	13.6788	6.53006	8.16596	4.579	5.85355	7.01553	7.62158	3.48022	10.5693	8.48026	15.6284	16.7852	5.15525	2.79535	8.20462	14.0727	7.24615	6.67833	21.3911	Level 2	-2.07
CHOS	Aliphatics	ESI-	2-(Sulfooxy)ethyl laurate	C14H28O6S	323.153	16.507	[M-H]-1	2.64469	7.86826	16.4125	17.2633	20.6366	104.788	27.4642	10.4338	13.2164	3.86796	7.02037	4.78451	5.37968	1.9437	3.51194	4.55127	5.58633	1.30987	6.92877	6.60311	16.4202	15.9987	3.02998	1.16378	7.60057	14.23	5.70567	3.96719	20.8715	Level 2	-2.58
CHOS	Aliphatics	ESI-	2-Tridecoxyethyl hydrogen sulfate	C15H32O5S	323.189	15.655	[M-H]-1	6.88843	13.1771	22.8585	24.1486	22.96	103.117	33.6394	14.3241	13.4436	2.03486	5.45091	3.53854	5.0095	3.86976	6.70778	7.00884	9.01507	1.13183	12.0306	9.39386	25.1656	25.2411	7.71178	3.76744	11.3579	21.4362	10.6206	7.04626	28.7341	Level 2	-1.32
CHO	Alicyclics	ESI-	(1S,5S,6R,8aS)-5-[(3R)-3-Hydroxy-3-methyl-4-penten-1-yl]-1,5,6-trimethyl-3-oxo-1,2,3,5,6,7,8,8a-octahydro-1-naphthalenecarboxylic acid	C20H30O4	333.206	14.5	[M-H]-1	1.08488	4.29681	8.21927	8.44679	10.1639	17.2686	10.3881	2.58873	5.2951	5.56453	5.98975	0.920115	1.31091	0.813314	0.974692	5.76599	1.98384	1.88007	1.15727	5.78904	3.68419	1.45601	0.92793	1.39536	14.4001	3.57178	2.46204	7.0011	5.88945	Level 2	-2.51
CHOS	Aliphatics	ESI-	10-Octadecene sulfate	C18H36O4S	347.225	19.013	[M-H]-1	0.284308	0.374518	1.40534	3.59244	5.80388	10.1046	6.21261	0.845407	1.38889	0.211783	0.321737	0.266631	0.196756	0.246897	0.224331	0.229903	0.221896	0.185526	0.310559	0.36321	3.64582	5.49991	0.44913	0.231116	0.313443	1.60596	0.257416	0.290661	2.29406	Level 2	-2.56
CHOS	Aliphatics	ESI-	{2-[(2E)-Pentadec-2-en-1-yloxy]ethoxy}sulfonic acid	C17H34O5S	349.204	16.491	[M-H]-1	2.74568	6.11949	11.0533	11.5339	14.4291	46.3314	14.6049	5.2266	7.13078	1.27785	6.88301	1.78123	1.93701	1.57685	2.4415	2.27658	3.25418	0.751284	4.45407	3.58718	9.74594	10.1098	1.97388	1.09606	4.92186	7.96901	3.98961	4.05939	12.6121	Level 2	-2.97
CHOS	Aliphatics	ESI-	{2-[(7E)-Heptadec-7-en-1-yloxy]ethoxy}sulfonic acid	C18H36O5S	363.22	18.058	[M-H]-1	3.26853	5.98644	20.1776	28.5209	49.3302	107.867	54.318	12.3055	15.8315	3.1193	11.6689	2.50696	3.66184	1.38646	4.675	3.07301	3.59769	0.970326	7.82975	7.22162	37.4425	51.0807	6.6119	1.54843	5.22376	16.16	5.17358	3.20287	27.2118	Level 2	-2.2
CHO	Alicyclics	ESI-	6β-Hydroxyeplerenone	C24H30O7	429.193	19.774	[M-H]-1	0.529177	0.556844	0.559982	1.21863	2.07443	3.50404	7.87151	4.34536	3.48124	17.9085	5.19551	6.39634	1.89236	4.02065	4.668	4.8583	4.94122	4.4558	2.88041	20.2045	9.40376	5.09766	5.62385	3.1283	3.22103	2.92459	2.43202	2.58945	2.42148	Level 3	3.21
