# Supplementary material for: The impacts of pollution sources and temperature on the light absorption of HULIS were revealed by UHPLC-HRMS/MS at the molecular structure level
Source: Copernicus journal article supplement (doi:10.5194/acp-25-11505-2025), 2025-09-29
Supplement: Supplementary file 2 [file acp-25-11505-2025-supplement.zip]

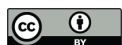

*Supplement of*

**The impacts of pollution sources and temperature on the light absorption of HULIS were revealed by UHPLC-HRMS/MS at the molecular structure level**

**Tao Qiu et al.**

*Correspondence to:* Zhijun Wu (zhijunwu@pku.edu.cn) and Dapeng Liang (liangdp@jlu.edu.cn)

- acp-25-11505-2025-supplement-title-page.pdf
- Supporting Information.pdf
- Table S7.xlsx

The copyright of individual parts of the supplement might differ from the article licence.
